1 **METABOLIC: High-throughput profiling of microbial genomes for functional traits,**  
2 **biogeochemistry, and community-scale metabolic networks**

3  
4  
5  
6  
7  
8  
9

Zhichao Zhou<sup>1</sup>, Patricia Q. Tran<sup>1,2</sup>, Adam M. Breister<sup>1</sup>, Yang Liu<sup>3</sup>, Kristopher Kieft<sup>1</sup>, Elise S. Cowley<sup>1</sup>, Ulas Karaoz<sup>4</sup>, Karthik Anantharaman<sup>1,\*</sup>

10 <sup>1</sup>Department of Bacteriology, University of Wisconsin-Madison, Madison, WI, 53706, USA,

11 <sup>2</sup>Department of Integrative Biology, University of Wisconsin-Madison, Madison, WI, 53706,  
12 USA,

13 <sup>3</sup>Institute for Advanced Study, Shenzhen University, Shenzhen, Guangdong Province, 518060,  
14 China

15 <sup>4</sup>Earth and Environmental Sciences, Lawrence Berkeley National Laboratory, Berkeley, CA,  
16 94720, USA

17  
18  
19  
20  
21  
22  
23  
24  
25  
26  
27  
28

\*Correspondence to Karthik Anantharaman, [karthik@bact.wisc.edu](mailto:karthik@bact.wisc.edu)

29 **ABSTRACT**

30

31 **Background:** Advances in microbiome science are being driven in large part due to our ability to study  
32 and infer microbial ecology from genomes reconstructed from mixed microbial communities using  
33 metagenomics and single-cell genomics. Such omics-based techniques allow us to read genomic blueprints  
34 of microorganisms, decipher their functional capacities and activities, and reconstruct their roles in  
35 biogeochemical processes. Currently available tools for analyses of genomic data can annotate and depict  
36 metabolic functions to some extent, however, no standardized approaches are currently available for the  
37 comprehensive characterization of metabolic predictions, metabolite exchanges, microbial interactions, and  
38 contributions to biogeochemical cycling.

39

40 **Results:** We present METABOLIC (**ME**Tabolic **And Biog**eOchemistry anaLyses **In miC**robes), a scalable  
41 software to advance microbial ecology and biogeochemistry using genomes at the resolution of individual  
42 organisms and/or microbial communities. The genome-scale workflow includes annotation of microbial  
43 genomes, motif validation of biochemically validated conserved protein residues, identification of  
44 metabolism markers, metabolic pathway analyses, and calculation of contributions to individual  
45 biogeochemical transformations and cycles. The community-scale workflow supplements genome-scale  
46 analyses with determination of genome abundance in the community, potential microbial metabolic  
47 handoffs and metabolite exchange, and calculation of microbial community contributions to  
48 biogeochemical cycles. METABOLIC can take input genomes from isolates, metagenome-assembled  
49 genomes, or from single-cell genomes. Results are presented in the form of tables for metabolism and a  
50 variety of visualizations including biogeochemical cycling potential, representation of sequential metabolic  
51 transformations, and community-scale metabolic networks using a newly defined metric ‘MN-score’  
52 (metabolic network score). METABOLIC takes ~3 hours with 40 CPU threads to process ~100 genomes  
53 and metagenomic reads within which the most compute-demanding part of hmmsearch takes ~45 mins,  
54 while it takes ~5 hours to complete hmmsearch for ~3600 genomes. Tests of accuracy, robustness, and  
55 consistency suggest METABOLIC provides better performance compared to other software and online  
56 servers. To highlight the utility and versatility of METABOLIC, we demonstrate its capabilities on diverse  
57 metagenomic datasets from the marine subsurface, terrestrial subsurface, meadow soil, deep sea, freshwater  
58 lakes, wastewater, and the human gut.

59

60 **Conclusion:** METABOLIC enables consistent and reproducible study of microbial community ecology  
61 and biogeochemistry using a foundation of genome-informed microbial metabolism, and will advance the  
62 integration of uncultivated organisms into metabolic and biogeochemical models. METABOLIC is written  
63 in Perl and R and is freely available at <https://github.com/AnantharamanLab/METABOLIC> under GPLv3.

64

65 **Keywords:** functional traits, metagenome-assembled genomes, microbiome, biogeochemistry, metabolic  
66 potential, metabolic network.

## 67 BACKGROUND

68

69 Metagenomics and single-cell genomics have transformed the field of microbial ecology by  
70 revealing a rich diversity of microorganisms from diverse settings, including terrestrial [1-3]  
71 and marine environments [4, 5] and the human body [6]. These approaches can provide an  
72 unbiased and insightful view into microorganisms mediating and contributing to  
73 biogeochemical activities at a number of scales ranging from individual organisms to  
74 communities [2, 7-9]. Recent studies have also enabled the recovery of hundreds to thousands  
75 of genomes from a single sample or environment [2, 8, 10, 11]. However, analyses of ever-  
76 increasing datasets remain a challenge. For example, scalable and reproducible bioinformatic  
77 approaches to characterize metabolism and biogeochemistry and standardize their analyses and  
78 representation for large datasets are lacking.

79

80 Microbially-mediated biogeochemical processes serve as important driving forces for the  
81 transformation and cycling of elements, energy, and matter among the lithosphere, atmosphere,  
82 hydrosphere, and biosphere [12]. Microbial communities in natural environmental settings exist  
83 in the form of complex and highly connected networks that share and compete for metabolites  
84 [13, 14]. The interdependent and cross-linked metabolic and biogeochemical interactions  
85 within a community can provide a relatively high level of plasticity and flexibility [2, 15]. For  
86 instance, multiple metabolic steps within a specific pathway are often separately distributed in  
87 a number of microorganisms and they are interdependent on utilizing the substrates [2, 16, 17].  
88 This phenomenon, referred to as ‘metabolic handoffs’, is based on sequential metabolic  
89 transformations, and provides the benefit of high resilience of metabolic activities which make  
90 both the community and function stable in the face of perturbations [2, 16, 17]. It is therefore  
91 highly valuable to obtain the information of microbial metabolic function from the perspective  
92 of individual genomes as well as the entire microbial community. Our current knowledge of  
93 microbial metabolic networks is quite limited due to the lack of quantitative approaches to  
94 interpret functional details and reconstruct metabolic relationships [2]. This requires further  
95 investigation based on advanced genomic techniques and insights provided by the ever-  
96 expanding microbial genome databases.

97

98 Prediction of microbial metabolism relies on the annotation of protein function for  
99 microorganisms using a number of established databases, e.g., KEGG [18], MetaCyc [19],  
100 Pfam [20], TIGRFam [21], SEED/RAST [22], and eggNOG [23]. However, these results are  
101 often highly detailed, and therefore can be overwhelming to users. Obtaining a functional  
102 profile and identifying metabolic pathways in a microbial genome can involve manual  
103 inspection of thousands of genes [24]. Organizing, interpreting, and visualizing such datasets  
104 remains a challenge and is often untenable especially with datasets larger than one microbial  
105 genome. There is a critical need for approaches and tools to identify and validate the presence  
106 of metabolic pathways, biogeochemical function, and connections in microbial communities in  
107 a user-friendly manner. Such tools addressing this gap would also allow standardization of  
108 methods and easier integration of genome-informed metabolism into biogeochemical models,  
109 which currently rely primarily on physicochemical data and treat microorganisms as black  
110 boxes [25]. A recent statistical study indicates that incorporating microbial community structure  
111 in biogeochemical modeling could significantly increase model accuracy of processes that are  
112 mediated by narrow phylogenetic guilds via functional gene data, and processes that are  
113 mediated by facultative microorganisms via community diversity metrics [26]. This highlights  
114 the importance of integrating microbial community and genomic information into the  
115 prediction and modeling of biogeochemical processes.

116

117 Here we present the software METABOLIC, a toolkit to profile metabolic and biogeochemical  
118 functional traits based on microbial genomes. METABOLIC integrates annotation of proteins  
119 using KEGG [18], TIGRFam [21], Pfam [20], and custom hidden Markov model (HMM)  
120 databases [2], incorporates a motif validation step to accurately identify proteins based on prior  
121 biochemical validation, determines presence or absence of metabolic pathways based on KEGG  
122 modules, and produces user-friendly outputs in the form of tables and figures including a  
123 summary of functional profiles, biogeochemically-relevant pathways, and metabolic networks  
124 for individual genomes and at the community scale.

## 125 **METHODS**

126

### 127 **HMM databases used by METABOLIC**

128 To generate a broad range of metabolic gene HMM profiles, we integrated three sets of HMM-  
129 based databases, which are KOfam [27] (July 2019 release, containing HMM profiles for  
130 KEGG/KO with predefined score thresholds), TIGRfam [21] (Release 15.0), Pfam [20]  
131 (Release 32.0), and custom metabolic HMM profiles [2]. In order to achieve a better HMM  
132 search result excluding non-specific hits, we have tested and manually curated cutoffs for those  
133 HMM databases listed above into the resulting HMMs: KOfam database - KOfam suggested  
134 values; TIGRfam/Pfam/Custom databases - manually curated by adjusting noise cutoffs (NC)  
135 and trusted cutoffs (TC) to avoid potential false positive hits. For the KOfam suggested cutoffs,  
136 we considered both the score type (full length or domain) and the score value to assign whether  
137 an individual protein hit is significant or not. Methods on the manual curation of these databases  
138 are described in the next section.

139

### 140 **Curation of cutoff scores for metabolic HMMs**

141 Two curation methods for adjusting NC or TC of TIGRfam/Pfam/Custom databases were used  
142 for a specific HMM profile. First, we parsed and downloaded representative protein sequences  
143 according to either the corresponding KEGG identifier or UniProt identifier [28]. We then  
144 randomly subsampled a small portion of the sequences (10% of the whole collection if this was  
145 more than 10 sequences, or at least 10 sequences) as the query to search against the  
146 representative protein collections [29]. Subsequently, we obtained a collection of hmmsearch  
147 scores by pair-wise sequence comparisons. We plotted scores against hmmsearch hits and  
148 selected the mean value of the sharpest decreasing interval as the adjusted cutoff. Second, we  
149 downloaded a collection of proteins that belong to a specific HMM profile and pre-checked the  
150 quality and phylogeny of these proteins by constructing and manually inspecting phylogenetic  
151 trees. We applied pre-checked protein sequences as the query search against a set of training  
152 metagenomes (data not shown). We then obtained a collection of hmmsearch scores of resulting  
153 hits from the training metagenomes. By using a similar method as described above, the cutoff  
154 was selected as the mean value of the sharpest decreasing interval.

155

156 The following example demonstrates how the method above was used to curate the  
157 hydrogenase enzymes. We then expanded this method to all genes using a similar method. We  
158 downloaded the individual protein collections for each hydrogenase functional group from the  
159 HydDB [30], which included [FeFe] Group A-C series, [Fe] Group, and [NiFe] Group 1-4  
160 series. The individual hydrogenase functional groups were further categorized based on the  
161 catalyzing directions, which included H<sub>2</sub>-evolution, H<sub>2</sub>-uptake, H<sub>2</sub>-sensing, electron-  
162 bifurcation, and bidirection. To define the NC cutoff ('--cut\_nc' in hmmsearch) for individual  
163 hydrogenase groups, we used the protein sequences from each hydrogenase group as the query  
164 to hmmsearch against the overall hydrogenase collections. By plotting the resulting hmmsearch  
165 hit scores against individual hmmsearch hits, we selected the mean value of the sharpest  
166 decreasing interval as the cutoff value.

167

### 168 **Motif validation**

169 To automatically validate protein hits and avoid false positives, we introduced a motif  
170 validation step by comparing protein motifs against a manually curated set of highly conserved  
171 residues in important proteins. This manually curated set of highly conserved residues is  
172 derived from either reported works or protein alignments from this study. We chose 20 proteins  
173 associated with important metabolisms (with a focus on important biogeochemical cycling  
174 steps) that are prone to being misannotated into proteins within the same protein family. Details  
175 of these proteins are provided in [Additional file 8: Dataset S1](#). For example, DsrC (sulfite  
176 reductase subunit C) and TusE (tRNA 2-thiouridine synthesizing protein E) are similar proteins  
177 that are commonly misannotated. Both of them are assigned to the family KO:K11179 in the  
178 KEGG database. To avoid assigning TusE as a sulfite reductase, we identified a specific motif  
179 for DsrC but not TusE (GPXKXXCXXXGXPXPXXCX", where "X" stands for any amino  
180 acid) [31]. We used these specific motifs to filter out proteins that have high sequence similarity  
181 but functionally divergent homologs.

182

## 183 **Annotation of carbohydrate-active enzymes and peptidases**

184 For carbohydrate-active enzymes (CAZymes), dbCAN2 [32] was used to annotate proteins with  
185 default settings. The hmmscan parser and HMM database (2019-09-05 release) were  
186 downloaded from the dbCAN2 online repository (<http://bcbl.unl.edu/dbCAN2/download/>) [32].  
187 The non-redundant library of protein sequences which contains all the peptidase/inhibitor units  
188 from the peptidase (inhibitor) database MEROPS [33] was used as the reference database to  
189 search against putative peptidases and inhibitors using DIAMOND. The settings used for the  
190 DIAMOND BLASTP search were “-k 1 -e 1e-10 --query-cover 80 --id 50” [34]. We used the  
191 ‘MEROPS pepunit’ database since it only includes the functional unit of peptidases/inhibitors  
192 [33] which can effectively avoid potential non-specific hits.

193

## 194 **Implementation of METABOLIC-G and METABOLIC-C**

195 To target specific applications in processing omics datasets, we have implemented two versions  
196 of METABOLIC – METABOLIC-G (genome version) and METABOLIC-C (community  
197 version). METABOLIC-G intakes only genome files and provides analyses for individual  
198 genome sequences. METABOLIC-C includes an option for users to include metagenomic reads  
199 for mapping to metagenome-assembled genomes (MAGs).

200

201 Using Bowtie 2 (version  $\geq$  v2.3.4.1) [35], metagenomic bam files were generated by mapping  
202 all input metagenomic reads to gene collections from input genomes. Subsequently, SAMtools  
203 (version  $\geq$  v0.1.19) [36], BAMtools (version  $\geq$  v2.4.0) [37], and CoverM  
204 (<https://github.com/wwood/CoverM>) were used to convert bam files to sorted bam files and to  
205 calculate the gene depth of read coverage. To calculate the relative abundance of a specific  
206 biogeochemical cycling step, all the coverage of genes that are responsible for this step were  
207 summed up and normalized by overall gene coverage. Reads from single-cell and isolate  
208 genomes can also be mapped in an identical manner to metagenomes. The gene coverage result  
209 generated by metagenomic read mapping was further used in downstream processing steps to  
210 conduct community-scale interaction and network analyses.

211

## 212 **Classifying microbial genomes into taxonomic groups**

213 To study community-scale interactions and networks of each microbial group within the whole  
214 community, we classified microbial genomes into individual taxonomic groups. GTDB-Tk  
215 v0.1.3 [38] was used to assign taxonomy of input genomes with default settings. GTDB-Tk can  
216 provide automated and objective taxonomic classification based on the rank-normalized  
217 Genome Taxonomy Database (GTDB) taxonomy within which the taxonomy ranks were  
218 established by a sophisticated criterion counting the relative evolutionary divergence (RED)  
219 and average nucleotide identity (ANI) [38, 39]. Subsequently, genomes were clustered into  
220 microbial groups at the phylum level, except for Proteobacteria which were replaced by its  
221 subordinate classes due to its wide coverage. Taxonomic assignment information for each  
222 genome was used in the downstream community analyses.

223

## 224 **Analyses and visualization of metabolic outputs, biogeochemical cycles, MN-scores, 225 metabolic networks, and energy flow potential**

226 To visualize the outputted metabolic results, R script “*draw\_biogeochemical\_cycles.R*” was  
227 used to draw the corresponding metabolic pathways for individual genomes. We integrated  
228 HMM profiles that are related to biogeochemical activities and assigned HMM profiles to 31  
229 distinct biogeochemical cycling steps (See details in “METABOLIC\_template\_and\_database”  
230 folder on the GitHub page). The script can generate figures showing biogeochemical cycles for  
231 individual genomes and the summarized biogeochemical cycle for the whole community. By  
232 using the results of metabolic profiling generated from HMM search and gene coverage from  
233 the mapping of metagenomic reads, we can depict metabolic capacities of both individual  
234 genomes and all genomes within a community as a whole. The community-level diagrams,  
235 including sequential transformations, metabolic energy flow, and metabolic network diagrams,  
236 were generated using both metabolic profiling and gene coverage results. The diagrams are  
237 made by the scripts “*draw\_sequential\_reaction.R*” (using R package “*ggplot2*” [40]),  
238 “*draw\_metabolic\_energy\_flow.R*” (using R package “*ggalluvial*” [41]), and  
239 “*draw\_metabolic\_network.R*” (using R package “*ggraph*” [42]), respectively (For details, refer  
240 to GitHub README page).

241  
242  
243  
244  
245  
246  
247  
248  
249  
250  
251  
252  
253  
254  
255  
256  
257  
258  
259  
260  
261  
262  
263  
264  
265  
266  
267  
268  
269  
270  
271  
272  
273  
274  
275  
276  
277  
278  
279  
280  
281  
282  
283  
284  
285  
286  
287  
288  
289  
290  
291  
292  
293  
294  
295  
296  
297  
298

MN-score (metabolic network score) is a metric reflecting the functional capacity and abundance of a microbial community in co-sharing metabolic networks. It was calculated at the community-scale level based on results of metabolic profiling and gene coverage from metagenomic read mapping as described above. Metabolic potential for the whole community was profiled into individual functions that either mediated specific pathways or transformed certain substrates into products; MN-score for each function indicates its distribution weight within the metabolic networks which was calculated by summing up all the coverage values of genes belonging to the function and subsequently normalizing it by overall gene coverage. For each function, the contribution percentage of each microbial phylum in the microbial community was also calculated accordingly. Detailed description for calculating MN-scores are further provided in the results section.

### **Example of metabolic diagrams**

An example of community-scale analyses including element biogeochemical cycling and sequential reaction analyses, metabolic network and energy flow potential analyses, and MN-score calculation were conducted using a metagenomic dataset of microbial community inhabiting deep-sea hydrothermal vent environment of Guaymas Basin in the Pacific Ocean [43]. It contains 98 MAGs and 1 set of metagenomic reads (genomes were available at NCBI BioProject PRJNA522654 and metagenomic reads were deposited to NCBI SRA with accession as SRR3577362).

A recent metagenomic-based study of the microbial community from an aquifer adjacent to Colorado River, located near Rifle, has provided an accurate reconstruction of the metabolism and ecological roles of the microbial majority [2]. From underground water and sediments of the terrestrial subsurface at Rifle, 2545 reconstructed MAGs were obtained (genomes are under NCBI BioProject PRJNA288027). They were used as the *in silico* dataset to test METABOLIC's performance. First, all the microbial genomes were dereplicated by dRep v2.0.5 [44] to pick the representative genomes for downstream analysis using the setting of '-comp 85'. Then, METABOLIC-G was applied to profile the functional traits of these representative genomes using default settings. Finally, the metabolic profile chart was depicted by assigning functional traits to GTDB taxonomy-clustered genome groups.

### **Test of software performance for different environments**

To benchmark and test the performance of METABOLIC in different environments, eight datasets of metagenomes and metagenomic reads from marine, terrestrial, and human environments were used. These included marine subsurface sediments [45] (Deep biosphere beneath Hydrate Ridge offshore Oregon), freshwater lake [46] (Lake Tanganyika, eastern Africa), colorectal cancer (CRC) patient gut [47], healthy human gut [47], deep-sea hydrothermal vent (Guaymas Basin, Gulf of California) [43], terrestrial subsurface sediments and water (Rifle, CO, USA) [2], meadow soils [48] (Angelo Coastal Range Reserve, CA, USA), and advanced water treatment facility [49] (Groundwater Replenishment System, Orange County, CA, USA). Default settings were used for running METABOLIC-C.

### **Comparison of community-scale metabolism**

To compare the metabolic profile of two environments at the community scale, MN-score was used as the benchmarker. Two sets of environment pairs were compared, including marine subsurface sediments [45] and terrestrial subsurface sediments and water [2], and freshwater lake [46] and deep-sea hydrothermal vent [43]. To demonstrate differences between these environments to specific biogeochemical processes, we focused on the biogeochemical cycling of sulfur. The sulfur biogeochemical cycling diagrams were depicted according to the number of genomes and genome coverage of organisms that contain each biogeochemical cycling step.

### **Metabolism in human microbiomes**

To inspect the metabolism of microorganisms in the human microbiome (associated with skin, oral mucosa, conjunctiva, gastrointestinal tracts, etc.), a subset of KOfam HMMs (139 HMM profiles) were used as markers to depict the human microbiome metabolism (parsed by HuMiChip targeted functional gene families [50]). They included 10 function categories as

299 follows: amino acid metabolism, carbohydrate metabolism, energy metabolism, glycan  
300 biosynthesis and metabolism, lipid metabolism, metabolism of cofactors and vitamins,  
301 metabolism of other amino acids, metabolism of terpenoids and polyketides, nucleotide  
302 metabolism, and translation. The CRC and healthy human gut (healthy control) sample datasets  
303 were used as the input (Accession IDs: Bioproject PRJEB7774 Sample 31874 and Sample  
304 532796). Heatmap of presence/absence of these functions were depicted by R package  
305 “*pheatmap*” [51] with 189 horizontal entries (there are duplications of HMM profiles among  
306 function categories; for detailed human microbiome metabolism markers refer to [Additional](#)  
307 [file 9: Dataset S2](#)).

308

### 309 **Representation of microbial cell metabolism**

310 To provide a schematic representation of the metabolism of microbial cells, two microbial  
311 genomes were used as examples, Hadesarchaea archaeon 1244-C3-H4-B1 and Nitrospirae  
312 bacteria M\_DeepCast\_50m\_m2\_151. METABOLIC-G results of these two genomes, including  
313 functional traits and KEGG modules, were used to draw the cell metabolism diagrams.

314

### 315 **Metatranscriptome analysis by METABOLIC**

316 METABOLIC-C can take metatranscriptomic reads as input into transcript coverage  
317 calculation and integrate the result to downstream community analyses. METABOLIC-C uses  
318 the same method as that of gene coverage calculation, including mapping transcriptomic reads  
319 to the gene collection from input genomes, converting bam files to sorted bam files, and  
320 calculating the transcript coverage. The raw transcript coverage was further normalized by the  
321 gene length and metatranscriptomic read number in Reads Per Kilobase of transcript, per  
322 Million mapped reads (RPKM). Hydrothermal vent and background seawater transcriptomic  
323 reads from Guaymas Basin (NCBI SRA accessions SRR452448 and SRR453184) were used to  
324 test the outcome of metatranscriptome analysis.

325

## 326 **RESULTS AND DISCUSSION**

327

328 Given the ever-increasing number of microbial genomes from microbiome studies, we  
329 developed METABOLIC to enable scalable analyses of metabolic pathways and enable  
330 visualization of biogeochemical cycles and community-scale metabolic networks.  
331 METABOLIC is the first software to elucidate community-scale networks of metabolic  
332 tradeoffs, energy flow, and metabolic connections based on genome composition. While  
333 METABOLIC relies on microbial genomes and metagenomic reads for underpinning its  
334 analyses, it can easily integrate transcriptomic datasets to provide an activity-based measure of  
335 community networks.

336

### 337 **Workflow to determine the presence of metabolic pathways in microbial genomes**

338 METABOLIC is written in Perl and R and is expected to run on Unix, Linux, or macOS. The  
339 prerequisites are described on METABOLIC’s GitHub page  
340 (<https://github.com/AnantharamanLab/METABOLIC>). The input folder requires microbial  
341 genome sequences in FASTA format and an optional set of genomic/metagenomic reads which  
342 were used to reconstruct those genomes ([Figure 1](#)). Genomic sequences are annotated by  
343 Prodigal [52], or a user can provide self-annotated proteins (with extensions of “.faa”) to  
344 facilitate incorporation into existing pipelines. We have also included an accessory Perl script  
345 which can help users to parse out the gene and protein sequences out of input genomes based  
346 on the Prodigal-generated “.gff” files. These files are used in the downstream steps involving  
347 the mapping of genomic/metagenomic reads.

348

349 Proteins are queried against HMM databases (KEGG KOfam, Pfam, TIGRfam, and custom  
350 HMMs) using *hmmsearch* implemented within HMMER [29] which applies methods to detect  
351 remote homologs as sensitively and efficiently as possible. After the *hmmsearch* step,  
352 METABOLIC subsequently validates the primary outputs by a motif-checking step for a subset  
353 of protein families; only those protein hits which successfully pass this step are regarded as  
354 significant hits.

355

356 METABOLIC relies on matches to the above databases to infer the presence of specific  
357 metabolic pathways in microbial genomes. Individual KEGG annotations are inferred in the  
358 context of KEGG modules for a better interpretation of metabolic pathways. A KEGG module  
359 is comprised of multiple steps with each step representing a distinct metabolic function. We  
360 parsed the KEGG module database [53] to link the existing relationship of KO identifiers to  
361 KEGG module identifiers to project our KEGG annotation result into the metabolic network  
362 which was constructed by individual building blocks – modules – for better representation of  
363 metabolic blueprints of input genomes. In most cases, we used KOfam HMM profiles for  
364 KEGG module assignments. For a specific set of important metabolic marker proteins and  
365 commonly misannotated proteins, we also applied the TIGRfam/Pfam/custom HMM profiles  
366 and motif-validation steps. The software has customizable settings for increasing or decreasing  
367 the priority of specific databases, primarily meant to increase annotation confidence by  
368 preferentially using custom HMM databases over KEGG KOfam when targeting the same set  
369 of proteins.

370  
371 Since individual genomes from metagenomes and single-cell genomes can often have  
372 incomplete metabolic pathways, we provide an option to determine the completeness of a  
373 metabolic pathway (or a module here). A user-defined cutoff is used to estimate the  
374 completeness of a given module (the default cutoff is the presence of 75% of metabolic  
375 steps/genes within a given module), which is then used to produce a KEGG module  
376 presence/absence table. All modules exceeding the cutoff are determined to be complete.  
377 Meanwhile, the presence/absence information for each module step is also summarized in an  
378 overall output table to facilitate further detailed investigations.

379  
380 Outputs consist of six different results that are reported in an Excel spreadsheet ([Additional file](#)  
381 [1: Figure S1](#)). These contain details of protein hits ([Additional file 1: Figure S1A](#)) which include  
382 both presence/absence and protein names, presence/absence of functional traits ([Additional file](#)  
383 [1: Figure S1B](#)), presence/absence of KEGG modules ([Additional file 1: Figure S1C](#)),  
384 presence/absence of KEGG module steps ([Additional file 1: Figure S1D](#)), CAZyme hits  
385 ([Additional file 1: Figure S1E](#)) and peptidase/inhibitor hits ([Additional file 1: Figure S1F](#)). For  
386 each HMM profile, the protein hits from all input genomes can be used for the construction of  
387 phylogenetic trees or further be combined with additional datasets or reference protein  
388 collections for detailed evolutionary analyses.

### 389 390 **Elemental cycling pathway analyses enable quantitative calculation of microbial** 391 **contributions to biogeochemical cycles**

392 The software identifies and highlights specific pathways of importance in microbiomes  
393 associated with energy metabolism and biogeochemistry. To visualize pathways of  
394 biogeochemical importance, the software generates schematic profiles for nitrogen, carbon,  
395 sulfur, and other elemental cycles for each genome. The set of genomes used as input is  
396 considered the “community”, and each genome within is considered an “organism” when doing  
397 these calculations. A summary schematic diagram at the community level integrates results  
398 from all individual genomes within a given dataset ([Figure 2](#)) and includes computed  
399 abundances for each step in a biogeochemical cycle if the genomic/metagenomic read datasets  
400 are provided. The genome number labeled in the figure indicates the number/quantity of  
401 genomes that contain the specific gene components of a biogeochemical cycling step ([Figure](#)  
402 [2](#)) [2]. In other words, it represents the number of organisms within a given community inferred  
403 to be able to perform a given metabolic or biogeochemical transformation. The abundance  
404 percentage indicates the relative abundance of microbial genomes that contain the specific gene  
405 components of a biogeochemical cycling step among all microbial genomes in a given  
406 community ([Figure 2](#)) [2].

### 407 408 **Elucidating sequential reactions involving inorganic and organic compounds**

409 Microorganisms in nature often do not encode pathways for the complete transformation of  
410 compounds. For example, microorganisms possess partial pathways for denitrification that can  
411 release intermediate compounds like nitrite, nitric oxide, and nitrous oxide in lieu of nitrogen  
412 gas which is produced by complete denitrification [54]. A greater energy yield could be  
413 achieved if one microorganism conducts all steps associated with a pathway (such as



414 denitrification) [2] since it could fully use all available energy from the reaction. However, in  
415 reality, few organisms in microbial communities carry out multiple steps in complex pathways;  
416 organisms commonly rely on other members of microbial communities to conduct sequential  
417 reactions in pathways [2, 55, 56]. METABOLIC summarizes and enables visualization of the  
418 genome number and coverage (relative abundance) of microorganisms that are putatively  
419 involved in the sequential transformation of both important inorganic and organic compounds  
420 (Figure 3). This provides a qualitative and quantitative calculation of microbial interactions and  
421 connections using shared metabolites associated with inorganic and organic transformations.

### 422 423 **Construction of metabolic networks to infer connections between microbial metabolism** 424 **and biogeochemical cycles**

425 Given the abundance of microbial pathway information generated by METABOLIC, we  
426 identified co-existing metabolisms in microbial genomes as a measure of connections between  
427 different metabolic functions and biogeochemical steps. In the context of biogeochemistry, this  
428 approach allows the evaluation of relatedness among biogeochemical steps and the connection  
429 contribution by microorganisms. This is enabled at the resolution of individual genomes using  
430 the phylogenetic classification (Figure 4) assigned by GTDB-tk [38]. As an example, we have  
431 demonstrated this approach on a microbial community inhabiting deep-sea hydrothermal vents.  
432 We divided the microbial community of deep-sea hydrothermal vents into 18 phylum-level  
433 groups (except for Proteobacteria which were divided into their subordinate classes). The  
434 metabolic connection network diagrams were depicted at the resolution of both individual phyla  
435 and the entire community level (Additional file 10: Dataset S3). Figure 4 demonstrates  
436 metabolic connections that were represented with individual metabolic/biogeochemical cycling  
437 steps depicted as nodes, and the connections between two given nodes depicted as edges. The  
438 size of a given node is proportional to the gene coverage associated with the  
439 metabolic/biogeochemical cycling step. The thickness of a given edge was depicted based on  
440 the average of gene coverage values of these two biogeochemical cycling steps (the connected  
441 nodes). More edges connecting two nodes represent more connections between these two steps.  
442 The thickness of edges represents gene coverages (measured as the average of these two steps).  
443 The color of the edge corresponds to the taxonomic group, and at the whole community level,  
444 more abundant microbial groups were more represented in the diagram (Figure 4). Overall,  
445 METABOLIC provides a comprehensive approach to construct and visualize metabolic  
446 networks associated with important pathways in energy metabolism and biogeochemical  
447 cycling in microbial communities and ecosystems.

### 448 449 **Calculating MN-scores to represent function weights and microbial group contribution** 450 **in metabolic networks**

451 To address the lack of quantitative and reproducible measures to represent potential metabolic  
452 exchange and interactions in microbial communities, we developed a new metric that we termed  
453 MN-score (metabolic networking scores). MN-scores quantitatively measure “function  
454 weights” within a microbial community as reflected by the metabolic profile and gene coverage.  
455 As metabolic potential for the whole community was profiled into individual functions that  
456 either mediated specific pathways or transformed certain substrates into products, a function  
457 weight that reflects the abundance fraction for each function can be used to represent the overall  
458 metabolic potential of the community. MN-scores resolved the functional capacity and  
459 abundance in the co-sharing metabolic networks as studied and visualized in the above section.  
460 Towards this (Figure 5), we divided metabolic/biogeochemical cycling steps (31 in total) into  
461 a finer level – function (51 functions in total) – for better resolution on reflecting metabolic  
462 networks. By using similar methods for determining metabolic interactions (as in the above  
463 section), we selected functions that are shared among genomes and summarized their weights  
464 within the whole community by adding up their abundances. More frequently shared functions  
465 and their higher abundances lead to higher MN-scores, which quantitatively reflects the function  
466 weights in metabolic networks (Figure 5). MN-score reflects the same metabolic networking  
467 pattern with the above description on the edges (networking lines) connecting the nodes  
468 (metabolic steps) that – more edges connecting two nodes indicates two steps are more co-  
469 shared, thicker edges indicate higher gene abundance for the metabolic steps. The MN-scores  
470 can integratively represent these two networking patterns and serve as metrics to measure these  
471 function weights. At the same time, we also calculated each microbial group’s (phylum in this

472 case) contribution to the MN-score of a specific function within the community (Figure 5). A  
473 higher microbial group contribution percentage value indicates that one function is more  
474 represented by the microbial group (for both gene presence and abundance) in the metabolic  
475 networks. MN-scores provide a quantitative measure on comparing function weights and  
476 microbial group contributions within metabolic networks.

477

#### 478 **Visualizing energy flow potential of metabolic reactions driven by microbial groups**

479 To understand the contributions of microbial groups towards energy flow potential associated  
480 with specific metabolic and biogeochemical transformations, we developed an approach to  
481 visualize energy flow potential in communities at multiple scales including specific taxonomic  
482 groups, associated with a specific metabolic transformation, and entire biogeochemical cycles  
483 such as for carbon, nitrogen, or sulfur. Our approach involves the use of Sankey diagrams (also  
484 called ‘*Alluvial*’ plots) to represent the fractions of metabolic functions that are contributed by  
485 various microbial groups in a given community (Figure 6). This is referred to as an ‘energy  
486 flow potential’ diagram and allows visualization of metabolic reactions as the link between  
487 microbial contributors clustered as taxonomic groups and biogeochemical cycles at a  
488 community level (Figure 6 and Additional file 10: Dataset S3). The function fraction was  
489 calculated by accumulating the genome coverage values of genomes from a specific microbial  
490 group that possesses a given functional trait. The width of curved lines from a specific microbial  
491 group to a given functional trait indicates their corresponding proportional contribution to a  
492 specific metabolism (Figure 6). Alternatively, the genomic/metagenomic datasets which are  
493 used in constructing the above two diagrams: metabolic network diagram (Figure 4) and  
494 metabolic energy flow potential diagram (Figure 6), can be replaced by  
495 transcriptomic/metatranscriptomic datasets, and correspondingly, the gene coverage values will  
496 be replaced by gene expression values, and therefore, they will be representing the  
497 transcriptional activity patterns of metabolic network and metabolic energy flow potential at  
498 the community level (Additional file 2, 3, 4, and 5: Figure S2, S3, S4, and S5).

499

500 The microbial community dataset of 98 MAGs from a deep-sea hydrothermal vent was used as  
501 a test to demonstrate this workflow. After running the bioinformatic analyses described above,  
502 resulting tables and diagrams were compiled and visualized accordingly (Additional file 10:  
503 Dataset S3). Results for metabolic networks and MN-scores of the deep-sea hydrothermal vent  
504 environment indicate that the microbial community depends on mixotrophy and sulfur  
505 oxidation for energy conservation and involves in arsenate reduction potentially responsible for  
506 detoxification/arsenate resistance [57]. MN-scores indicate that amino acid utilization, complex  
507 carbon degradation, acetate oxidation, and fermentation are the major heterotrophic  
508 metabolisms for this environment; CO<sub>2</sub>-fixation and sulfur oxidation also occupy a  
509 considerable functional fraction, which indicates heterotrophy and autotrophy both contribute  
510 to energy conservation (Figure 5). Gammaproteobacteria are the most numerically abundant  
511 group in the community and they occupy significant functional fractions amongst both  
512 heterotrophic and autotrophic metabolisms (MN-score contribution ranging from 59-100%)  
513 (Figure 5, 6), which is consistent with previous findings in the Guaymas Basin hydrothermal  
514 environment. Meanwhile, MN-scores also explicitly reflect the involvement of other minor  
515 electron donors in energy conservation which are mainly contributed by Gammaproteobacteria,  
516 such as hydrogen and methane (Figure 5). This is also consistent with previous findings [43,  
517 58] and indicates the accuracy and sensitivity of MN-scores to reflect metabolic potentials.

518

#### 519 **METABOLIC is scalable, fast, and accurate**

520 To test METABOLIC’s performance, we applied the software to analyze the metagenomic  
521 dataset which includes 98 MAGs from a deep-sea hydrothermal vent, and two sets of  
522 metagenomic reads (that are subsets of original reads with 10 million reads for each pair  
523 comprising ~10% of the total reads). The total run time was ~3 hours using 40 CPU threads in  
524 a Linux version 4.15.0-48-generic server (Ubuntu v5.4.0). The most compute-demanding part  
525 is hmmsearch, which took ~45 mins. When tested on another dataset comprising ~3600  
526 microbial genomes (data not shown), METABOLIC could complete hmmsearch in ~5 hours  
527 by using 40 CPU threads.

528

529 In order to test the accuracy of the results predicted by METABOLIC, we picked 15 bacterial  
530 and archaeal genomes from Chloroflexi, Thaumarchaeota, and Crenarchaeota which are  
531 reported to have 3 Hydroxypropionate cycle (3HP) and/or 3-hydroxypropionate/4-  
532 hydroxybutyrate cycle (3HP/4HB) for carbon fixation. METABOLIC predicted results in line  
533 with annotations from the KEGG genome database which can be visualized in KEGG Mapper  
534 (Table 1). Our predictions are also in accord with biochemical evidence of the existence of  
535 corresponding carbon fixation pathways in each microbial group: 1) 3 out of 5 *Chloroflexi*  
536 genomes are predicted by both METABOLIC and KEGG to possess the 3HP pathway and none  
537 of all these *Chloroflexi* genomes are predicted to possess the 3HP/4HB pathway. This is  
538 consistent with current reports based on biochemical and molecular experiments that only  
539 organisms from the phylum *Chloroflexi* are known to possess the 3HP pathway [59] (Table 1).  
540 2) All 5 *Thaumarchaeota* genomes and 2 out of 5 *Crenarchaeota* genomes are predicted by  
541 both METABOLIC and KEGG to possess the 3HP/4HB pathway and none of these  
542 *Thaumarchaeota* and *Crenarchaeota* genomes are predicted to possess the 3HP pathway. This  
543 is consistent with current reports that only the 3HP/4HB pathway could be detected in  
544 *Crenarchaeota* and *Thaumarchaeota* [60, 61] (Table 1). We have also applied METABOLIC  
545 on a large well-studied dataset comprising 2545 metagenome-assembled genomes from  
546 terrestrial subsurface sediments and groundwater [2]. The annotation results of METABOLIC  
547 are consistent with previously described reports (Additional file 6, 10: Figure S6, Dataset S3).  
548 These results suggest that METABOLIC can provide accurate annotations and genomic profiles  
549 and perform well as a functional predictor for microbial genomes and communities.

#### 551 **METABOLIC provides robust performance and consistent metabolic analyses**

552 Currently, several software packages and online servers are available for genome annotation  
553 and metabolic profiling. However, METABOLIC is unique in its ability to integrate multi-omic  
554 information towards elucidating metabolic connections, energy flow, and contribution of  
555 microorganisms to biogeochemical cycles. We compared the performance of METABOLIC  
556 (Figure 7A) to other software including GhostKOALA [62], BlastKOALA [62], KAAS [63],  
557 and RAST/SEED [22].

559 To compare the prediction performance (Figure 7B), we used two representative bacterial  
560 genomes as the test datasets. We randomly picked 100 protein sequences from individual  
561 genomes and submitted them to annotation by these five software/online servers. Predicted  
562 protein annotations by individual software and online servers were compared to their original  
563 annotations that were provided by the NCBI database (Additional file 11, 12: Dataset S4, S5).  
564 According to statistical methods of binary classification [64], the following parameters were  
565 used to make the comparison: 1) recall (also referred to as the sensitivity) as the true positive  
566 rate, 2) precision (also referred to as the positive predictive value) which indicates the  
567 reproducibility and repeatability of a measurement system, 3) accuracy which indicates the  
568 closeness of measurements to their true values, and 4)  $F_1$  value which is the harmonic mean of  
569 precision and recall, and reflects both these two parameters. Among the tested software/servers,  
570 the performance parameters of METABOLIC consistently placed it in the top 2 programs for  
571 recall and  $F_1$  and as the best for precision and accuracy. These results demonstrate that  
572 METABOLIC (Figure 7B) provides robust performance and consistent metabolic prediction  
573 for genomes that offer wide applicability of use for the downstream visualization and  
574 community-level analysis.

#### 576 **Metabolic and biogeochemical comparisons at the community scale in diverse environments**

578 To demonstrate the application and performance of METABOLIC in different samples, we  
579 tested eight distinct environments (marine subsurface, terrestrial subsurface, deep-sea  
580 hydrothermal vent, freshwater lake, gut microbiome from patients with colorectal cancer, gut  
581 microbiome from healthy control, meadow soil, wastewater treatment facility). Overall, we  
582 found METABOLIC to perform well across all the environments to profile microbial genomes  
583 with functional traits and biogeochemical cycles (Additional file 10: Dataset S3). Within these  
584 tested environments, we also performed community-scale metabolic comparisons based on the  
585 MN-score (Figure 8). MN-score fraction at the community scale reflects the overall metabolic  
586 profile distribution. Specifically, we compared samples from terrestrial and marine subsurface

587 and samples from hydrothermal vent and freshwater lake. We observed that terrestrial  
588 subsurface contains more abundant metabolic functions related to nitrogen cycling compared  
589 to the marine subsurface (Figure 8A), consistent with the previous characterization of these two  
590 environments [2, 65]. Deep-sea hydrothermal vent samples had a considerably high  
591 concentration of methane and hydrogen [43] as compared to Lake Tanganyika (freshwater  
592 lake); the deep-sea hydrothermal vent microbial community has more abundant metabolic  
593 functions associated with methanotrophy and hydrogen oxidation (Figure 8B). To focus on a  
594 specific biogeochemical cycle, we applied METABOLIC to compare sulfur related  
595 metabolisms at the community scale for these two environment pairs (Additional file 7: Figure  
596 S7). Terrestrial subsurface contains genomes covering more sulfur cycling steps compared to  
597 marine subsurface (7 steps vs 3 steps) (Additional file 7: Figure S7A). Freshwater lake contains  
598 genomes involving almost all the sulfur cycling steps except for sulfur reduction, while deep-  
599 sea hydrothermal vent contains less sulfur cycling steps (8 steps vs 6 steps) (Additional file 7:  
600 Figure S7B). Nevertheless, deep-sea hydrothermal vent has a higher fraction of genomes  
601 (59/98) and a higher relative abundance (73%) of these genomes involving sulfur oxidation  
602 compared to the freshwater lake (Additional file 7: Figure S7B). This indicates that the deep-  
603 sea hydrothermal vent microbial community has a more biased sulfur metabolism towards  
604 sulfur oxidation, which is consistent with previous metabolic characterization on the  
605 dependency of elemental sulfur in this environment [43, 66-68]. Collectively, by characterizing  
606 community-scale metabolism, METABOLIC can facilitate the comparison of overall  
607 functional profiles as well as functional profiles for a particular elemental cycle.

608

#### 609 **METABOLIC enables accurate reconstruction of cell metabolism**

610 To demonstrate applications of reconstructing and depicting cell metabolism based on  
611 METABOLIC results, two microbial genomes were used as an example (Figure 9). As  
612 illustrated in Figure 9A, Hadesarchaea archaeon 1244-C3-H4-B1 has no TCA cycling gene  
613 components, which is consistent with previous findings in archaea within this class [69].  
614 Gluconeogenesis/glycolysis pathways are also lacking in the genome; since gluconeogenesis is  
615 the central carbon metabolism responsible for generating sugar monomers which will be further  
616 biosynthesized to polysaccharides as important cell structural components [70], the lack of this  
617 pathway could be due to genome incompleteness. As an enigmatic archaeal class newly  
618 discovered in the recent decade, Hadesarchaea have distinctive metabolisms that separate them  
619 from conventional euryarchaeotal groups. They almost lost all TCA cycle gene components for  
620 the production of acetyl-CoA; while they could metabolize amino acids in a heterotrophic  
621 lifestyle [69]. It is posited that the Hadesarchaea genome has been subjected to streamline  
622 processing possibly due to nutrient limitations in their surrounding environment [69]. Due to  
623 their metabolic novelty and limited available genomes in the current time, there are still  
624 uncertainties on unknown/hypothetical genes and pathways and unclassified metabolic  
625 potential across the whole class. The previous metabolic characterization on four Hadesarchaea  
626 genomes indicates Hadesarchaea members could anaerobically oxidize CO and H<sub>2</sub> was  
627 produced as the side product [69]. In the Hadesarchaea archaeon 1244-C3-H4-B1 genome,  
628 METABOLIC results indicate the loss of all anaerobic carbon-monoxide dehydrogenase gene  
629 components, which suggests the distinctive metabolism of this Hadesarchaea archaeon from  
630 others and highlights the accuracy of METABOLIC in reflecting functional details.

631

632 We also reconstructed the metabolism for Nitrospirae bacteria M\_DeepCast\_50m\_m2\_151, a  
633 member of the *Nitrospirae* phylum reconstructed from Lake Tanganyika [46] (Figure 9B), it  
634 contains the full pathway for the TCA cycle and gluconeogenesis/glycolysis. Furthermore, it  
635 also has the full set of oxidative phosphorylation complexes for energy conservation and  
636 functional genes for nitrite oxidation to nitrate. Other nitrogen cycling metabolisms identified  
637 in this genome include ammonium oxidation, urea utilization, and nitrite reduction to nitric  
638 oxide. The Reverse TCA cycle pathway was identified for carbon fixation. The metabolic  
639 profiling result is in accord with the fact that Nitrospirae is a well-known nitrifying bacterial  
640 class capable of nitrite oxidation and living an autotrophic lifestyle [70]. Additionally, their  
641 more abundant distribution in nature compared to other nitrite-oxidizing bacteria such as  
642 *Nitrobacter* indicates a significant contribution to nitrogen cycling in the environment [70].  
643 This highlights the ability of METABOLIC in reflecting functional details of more common

644 and prevalent microorganisms compared to the Hadesarchaea archaeon. Notably as discovered  
645 from METABOLIC analyses, this bacterial genome also contains a wide range of transporter  
646 enzymes on the cell membrane, including mineral and organic ion transporters, sugar and lipid  
647 transporters, phosphate and amino acid transporters, heme and urea transporters,  
648 lipopolysaccharide and lipoprotein releasing system, bacterial secretion system, etc., which  
649 indicates its metabolic versatility and potential interactive activities with other organisms and  
650 the ambient environment. Collectively, METABOLIC result of functional profiling provides  
651 an intuitively-represented summary of a single microbial genome which enables depicting cell  
652 metabolism for better visualization of the functional capacity.

653

#### 654 **METABOLIC accurately represents metabolism in the human microbiome**

655 In addition to resolving microbial metabolism and biogeochemistry in environmental  
656 microbiomes, METABOLIC also accurately identifies metabolic traits associated with human  
657 microbiomes. The human microbiome contributes to normal human development, human  
658 physiology, and disease pathology. Study of human microbiomes are an advancing field and  
659 has been accelerated by the NIH's implementation of Human Microbiome Project [71]. While  
660 healthy and disease state human microbiome samples continue to be collected and sequenced  
661 at a rapid pace, the implications of microbial metabolism on human health largely remain a  
662 black box, much like microbial contributions to biogeochemical cycling. We demonstrate the  
663 utility of METABOLIC in highlighting metabolism in human microbiomes using publicly  
664 available samples from a study of human microbiome in colorectal cancer using stool samples  
665 collected from patients with colorectal cancer and healthy individuals. From the study, we  
666 selected one colorectal cancer (CRC) and an age and sex matched control (healthy human) gut  
667 metagenomes from stool samples to conduct the comparison (Figure 10). The heatmap indicates  
668 the human microbiome functional profiles of both samples based on the marker gene  
669 presence/absence patterns (Figure 10). As an example of METABOLIC's application, we  
670 demonstrate that there were 28 makers with variations > 10% in terms of the marker-containing  
671 genome numbers between these two states (Figure 10). These 28 markers involved all the ten  
672 metabolic categories except for lipid metabolism and translation, suggesting the broad  
673 functional differences between these two states. In addition to analyzing the human microbiome  
674 specific-functional markers, METABOLIC can be used as described in previous sections on  
675 human microbiome samples to visualize elemental nutrient cycling and analyze metabolic  
676 nutrient interaction. METABOLIC results provide a comprehensive functional profile that  
677 could be to represent human-microbial interactions; overall it enables systematic  
678 characterization of the composition, structure, function, and dynamics of microbial  
679 metabolisms in the human microbiome and facilitates omics-based studies of microbial  
680 community on human health [50].

681

#### 682 **Conclusions**

683 In the recent decade, the rapidly growing number of sequenced microbial genomes, including  
684 pure isolates, metagenome-assembled genomes, and single-cell genomes, have significantly  
685 contributed to the growth of microbial genome databases, which has made large-scale microbial  
686 genome analyses more tractable. Metabolic functional profile of microbial genomes at the scale  
687 of individual organisms and communities is essential for microbial ecologists and  
688 biogeochemists to have a comprehensive understanding of ecosystem processes and  
689 biogeochemistry, and as a conduit for enabling trait-based models of biogeochemistry. We have  
690 developed METABOLIC as a metabolic functional profiler that goes above and beyond current  
691 frameworks of genome/protein annotation platforms in providing protein annotations and  
692 metabolic pathway analyses that are used for inferring contribution of microorganisms,  
693 metabolism, interactions, activity, and biogeochemistry at the community-scale. METABOLIC  
694 is the first software to enable community-scale visualization of microbial metabolic handoffs,  
695 interactions, and contributions to biogeochemical cycles. We anticipate that METABOLIC will  
696 enable easier interpretation of microbial metabolism and biogeochemistry from metagenomes  
697 and genomes and enable microbiome research in diverse fields. Finally, METABOLIC will  
698 facilitate standardization and integration of genome-informed metabolism into metabolic and  
699 biogeochemical models.

700 **Additional files**

701 **Additional file 1: Figure S1.** METABOLIC result tables

702 **Additional file 2: Figure S2.** Metabolic network diagram based on the transcriptomic dataset  
703 from a hydrothermal vent sample

704 **Additional file 3: Figure S3.** Metabolic network diagram based on the transcriptomic dataset  
705 from hydrothermal background sample

706 **Additional file 4: Figure S4.** Microbial metabolic energy flow potential diagram based on the  
707 transcriptomic dataset from hydrothermal vent sample

708 **Additional file 5: Figure S5.** Microbial metabolic energy flow potential diagram based on the  
709 transcriptomic dataset from hydrothermal background sample

710 **Additional file 6: Figure S6.** Metabolic profile diagram of terrestrial subsurface microbial  
711 community

712 **Additional file 7: Figure S7.** Comparison of sulfur related metabolism at the community scale  
713 level

714 **Additional file 8: Dataset S1.** The motif sequences and motif pairs

715 **Additional file 9: Dataset S2.** Summary table of Human Microbiome Marker genes

716 **Additional file 10: Dataset S3.** METABOLIC result of eight different environments

717 **Additional file 11: Dataset S4.** The comparison of the protein prediction performance among  
718 five software packages/online servers on the genome of *Escherichia coli* O157H7 str. Sakai

719 **Additional file 12: Dataset S5.** The comparison of the protein prediction performance among  
720 five software packages/online servers on the genome of *Pseudomonas aeruginosa* PAO1

721

722 **Acknowledgments**

723 We thank the comments and suggestions from the users of METABOLIC, which helped to  
724 improve and expand the functions of this software.

725

726 **Funding**

727 We thank the University of Wisconsin - Office of the Vice-Chancellor for Research and  
728 Graduate Education, University of Wisconsin – Department of Bacteriology, Wisconsin Alumni  
729 Research Foundation, and the University of Wisconsin – College of Agriculture and Life  
730 Sciences for their support. PQT is supported by the Natural Sciences and Engineering Research  
731 Council of Canada (NSERC). KK is supported by the Wisconsin Distinguished Graduate  
732 Fellowship. ESC is supported by an NLM training grant to the Computation and Informatics in  
733 Biology and Medicine Training Program (NLM 5T15LM007359).

734

735

736 **Authors' contributions**

737 ZZ and KA conceptualized and designed the study. ZZ and PQT wrote the Perl and R scripts.  
738 ZZ ran the test data and improved the software. YL provided a part of the databases. PQT,  
739 AMB, KK, ESC, and UK provided ideas and comments, helped to set up the GitHub page, and  
740 contributed to improving the overall performance of the software. ZZ and KA wrote the  
741 manuscript, and all authors contributed and approved the final edition of the manuscript.

742

743 **Corresponding authors**

744 Correspondence to Karthik Anantharaman.

745

746 **Ethics declarations**

747 **Ethics approval and consent to participate**

748 Not applicable.

749

750 **Consent for publication**

751 Not applicable.

752

753 **Competing interests**

754 The authors declare that they have no competing interests.

755 **References:**

- 756 1. Wu X, Holmfeldt K, Hubalek V, Lundin D, Astrom M, Bertilsson S, Dopson M:  
757 **Microbial metagenomes from three aquifers in the Fennoscandian shield**  
758 **terrestrial deep biosphere reveal metabolic partitioning among populations.** *ISME*  
759 *J* 2016, **10**:1192-1203.
- 760 2. Anantharaman K, Brown CT, Hug LA, Sharon I, Castelle CJ, Probst AJ, Thomas BC,  
761 Singh A, Wilkins MJ, Karaoz U, et al: **Thousands of microbial genomes shed light**  
762 **on interconnected biogeochemical processes in an aquifer system.** *Nat Commun*  
763 2016, **7**:13219.
- 764 3. Probst AJ, Ladd B, Jarett JK, Geller-McGrath DE, Sieber CMK, Emerson JB,  
765 Anantharaman K, Thomas BC, Malmstrom RR, Stieglmeier M, et al: **Differential**  
766 **depth distribution of microbial function and putative symbionts through**  
767 **sediment-hosted aquifers in the deep terrestrial subsurface.** *Nat Microbiol* 2018,  
768 **3**:328-336.
- 769 4. Siegl A, Kamke J, Hochmuth T, Piel J, Richter M, Liang C, Dandekar T, Hentschel U:  
770 **Single-cell genomics reveals the lifestyle of Poribacteria, a candidate phylum**  
771 **symbiotically associated with marine sponges.** *ISME J* 2011, **5**:61-70.
- 772 5. Iverson V, Morris RM, Frazar CD, Berthiaume CT, Morales RL, Armbrust EV:  
773 **Untangling Genomes from Metagenomes: Revealing an Uncultured Class of**  
774 **Marine Euryarchaeota.** *Science* 2012, **335**:587-590.
- 775 6. Pasolli E, Asnicar F, Manara S, Zolfo M, Karcher N, Armanini F, Beghini F, Manghi P,  
776 Tett A, Ghensi P, et al: **Extensive Unexplored Human Microbiome Diversity**  
777 **Revealed by Over 150,000 Genomes from Metagenomes Spanning Age,**  
778 **Geography, and Lifestyle.** *Cell* 2019, **176**:649-662 e620.
- 779 7. Bowers RM, Kyrpides NC, Stepanauskas R, Harmon-Smith M, Doud D, Reddy T,  
780 Schulz F, Jarett J, Rivers AR, Eloie-Fadrosch EA: **Minimum information about a**  
781 **single amplified genome (MISAG) and a metagenome-assembled genome**  
782 **(MIMAG) of bacteria and archaea.** *Nat Biotechnol* 2017, **35**:725.
- 783 8. Parks DH, Rinke C, Chuvochina M, Chaumeil P-A, Woodcroft BJ, Evans PN,  
784 Hugenholtz P, Tyson GW: **Recovery of nearly 8,000 metagenome-assembled**  
785 **genomes substantially expands the tree of life.** *Nat Microbiol* 2017, **2**:1533-1542.
- 786 9. Hug LA, Baker BJ, Anantharaman K, Brown CT, Probst AJ, Castelle CJ, Butterfield  
787 CN, Hermsdorf AW, Amano Y, Ise K: **A new view of the tree of life.** *Nat Microbiol*  
788 2016, **1**:16048.
- 789 10. Kraemer S, Ramachandran A, Colatriano D, Lovejoy C, Walsh DA: **Diversity and**  
790 **biogeography of SAR11 bacteria from the Arctic Ocean.** *ISME J* 2020, **14**:79-90.
- 791 11. Ruuskanen MO, Colby G, St Pierre KA, St Louis VL, Aris-Brosou S, Poulain AJ:  
792 **Microbial genomes retrieved from High Arctic lake sediments encode for**  
793 **adaptation to cold and oligotrophic environments.** *Limnol Oceanogr* 2020,  
794 **65**:S233-S247.
- 795 12. Madsen EL: **Microorganisms and their roles in fundamental biogeochemical cycles.**  
796 *Curr Opin Biotechnol* 2011, **22**:456-464.
- 797 13. Abreu NA, Taga ME: **Decoding molecular interactions in microbial communities.**  
798 *FEMS Microbiol Rev* 2016, **40**:648-663.
- 799 14. Morris BEL, Henneberger R, Huber H, Moissl-Eichinger C: **Microbial syntrophy:**

- 800 **interaction for the common good.** *FEMS Microbiol Rev* 2013, **37**:384-406.
- 801 15. Baker BJ, Lazar CS, Teske AP, Dick GJ: **Genomic resolution of linkages in carbon,**  
802 **nitrogen, and sulfur cycling among widespread estuary sediment bacteria.**  
803 *Microbiome* 2015, **3**.
- 804 16. Morris BE, Henneberger R, Huber H, Moissl-Eichinger C: **Microbial syntrophy:**  
805 **interaction for the common good.** *FEMS Microbiol Rev* 2013, **37**:384-406.
- 806 17. Graf DR, Jones CM, Hallin S: **Intergenomic comparisons highlight modularity of**  
807 **the denitrification pathway and underpin the importance of community structure**  
808 **for N<sub>2</sub>O emissions.** *PLoS One* 2014, **9**:e114118.
- 809 18. Kanehisa M, Goto S: **KEGG: kyoto encyclopedia of genes and genomes.** *Nucleic*  
810 *Acids Res* 2000, **28**:27-30.
- 811 19. Caspi R, Foerster H, Fulcher CA, Hopkinson R, Ingraham J, Kaipa P, Krummenacker  
812 M, Paley S, Pick J, Rhee SY, et al: **MetaCyc: a multiorganism database of metabolic**  
813 **pathways and enzymes.** *Nucleic Acids Res* 2006, **34**:D511-516.
- 814 20. Finn RD, Bateman A, Clements J, Coggill P, Eberhardt RY, Eddy SR, Heger A,  
815 Hetherington K, Holm L, Mistry J, et al: **Pfam: the protein families database.** *Nucleic*  
816 *Acids Res* 2014, **42**:D222-230.
- 817 21. Selengut JD, Haft DH, Davidsen T, Ganapathy A, Gwinn-Giglio M, Nelson WC,  
818 Richter AR, White O: **TIGRFAMs and Genome Properties: tools for the assignment**  
819 **of molecular function and biological process in prokaryotic genomes.** *Nucleic Acids*  
820 *Res* 2007, **35**:D260-264.
- 821 22. Overbeek R, Olson R, Pusch GD, Olsen GJ, Davis JJ, Disz T, Edwards RA, Gerdes S,  
822 Parrello B, Shukla M: **The SEED and the Rapid Annotation of microbial genomes**  
823 **using Subsystems Technology (RAST).** *Nucleic Acids Res* 2013, **42**:D206-D214.
- 824 23. Huerta-Cepas J, Szklarczyk D, Forslund K, Cook H, Heller D, Walter MC, Rattei T,  
825 Mende DR, Sunagawa S, Kuhn M, et al: **eggNOG 4.5: a hierarchical orthology**  
826 **framework with improved functional annotations for eukaryotic, prokaryotic and**  
827 **viral sequences.** *Nucleic Acids Res* 2016, **44**:D286-D293.
- 828 24. Kanehisa M, Araki M, Goto S, Hattori M, Hirakawa M, Itoh M, Katayama T,  
829 Kawashima S, Okuda S, Tokimatsu T, Yamanishi Y: **KEGG for linking genomes to**  
830 **life and the environment.** *Nucleic Acids Res* 2008, **36**:D480-D484.
- 831 25. Schimel J: **1.13 - Biogeochemical Models: Implicit versus Explicit Microbiology.** In  
832 *Global Biogeochemical Cycles in the Climate System.* Edited by Schulze E-D,  
833 Heimann M, Harrison S, Holland E, Lloyd J, Prentice IC, Schimel D. San Diego:  
834 Academic Press; 2001: 177-183
- 835 26. Graham EB, Knelman JE, Schindlbacher A, Siciliano S, Breulmann M, Yannarell A,  
836 Beman JM, Abell G, Philippot L, Prosser J, et al: **Microbes as Engines of Ecosystem**  
837 **Function: When Does Community Structure Enhance Predictions of Ecosystem**  
838 **Processes?** *Front Microbio* 2016, **7**.
- 839 27. Aramaki T, Blanc-Mathieu R, Endo H, Ohkubo K, Kanehisa M, Goto S, Ogata H:  
840 **KofamKOALA: KEGG ortholog assignment based on profile HMM and adaptive**  
841 **score threshold.** *bioRxiv* 2019:602110.
- 842 28. UniProt C: **UniProt: a worldwide hub of protein knowledge.** *Nucleic Acids Res* 2019,  
843 **47**:D506-D515.



- 844 29. Finn RD, Clements J, Eddy SR: **HMMER web server: interactive sequence**  
845 **similarity searching.** *Nucleic Acids Res* 2011, **39**:W29-37.
- 846 30. Sondergaard D, Pedersen CN, Greening C: **HydDB: A web tool for hydrogenase**  
847 **classification and analysis.** *Sci Rep* 2016, **6**:34212.
- 848 31. Venceslau SS, Stockdreher Y, Dahl C, Pereira IA: **The "bacterial heterodisulfide"**  
849 **DsrC is a key protein in dissimilatory sulfur metabolism.** *Biochim Biophys Acta*  
850 2014, **1837**:1148-1164.
- 851 32. Zhang H, Yohe T, Huang L, Entwistle S, Wu P, Yang Z, Busk PK, Xu Y, Yin Y:  
852 **dbCAN2: a meta server for automated carbohydrate-active enzyme annotation.**  
853 *Nucleic Acids Res* 2018, **46**:W95-W101.
- 854 33. Rawlings ND, Barrett AJ, Finn R: **Twenty years of the MEROPS database of**  
855 **proteolytic enzymes, their substrates and inhibitors.** *Nucleic Acids Res* 2016,  
856 **44**:D343-D350.
- 857 34. Buchfink B, Xie C, Huson DH: **Fast and sensitive protein alignment using**  
858 **DIAMOND.** *Nat Methods* 2015, **12**:59-60.
- 859 35. Langmead B, Salzberg SL: **Fast gapped-read alignment with Bowtie 2.** *Nat Methods*  
860 2012, **9**:357.
- 861 36. Li H, Handsaker B, Wysoker A, Fennell T, Ruan J, Homer N, Marth G, Abecasis G,  
862 Durbin R, Genome Project Data Processing S: **The Sequence Alignment/Map format**  
863 **and SAMtools.** *Bioinformatics* 2009, **25**:2078-2079.
- 864 37. Barnett DW, Garrison EK, Quinlan AR, Stromberg MP, Marth GT: **BamTools: a C++**  
865 **API and toolkit for analyzing and managing BAM files.** *Bioinformatics* 2011,  
866 **27**:1691-1692.
- 867 38. Parks DH, Chuvochina M, Waite DW, Rinke C, Skarszewski A, Chaumeil P-A,  
868 Hugenholtz P: **A standardized bacterial taxonomy based on genome phylogeny**  
869 **substantially revises the tree of life.** *Nat Biotechnol* 2018, **36**:996-1004.
- 870 39. Chaumeil P-A, Mussig AJ, Hugenholtz P, Parks DH: **GTDB-Tk: a toolkit to classify**  
871 **genomes with the Genome Taxonomy Database.** *Bioinformatics* 2020, **36**:1925-1927.
- 872 40. Wickham H: *ggplot2: elegant graphics for data analysis.* New York: Springer-Verlag;  
873 2016.
- 874 41. Brunson JC: **ggalluvial: Alluvial diagrams in 'ggplot2'.** *R package version 09 1* 2018.
- 875 42. Pedersen TL: **ggraph: An implementation of grammar of graphics for graphs and**  
876 **networks.** *R package version 01* 2017.
- 877 43. Anantharaman K, Breier JA, Sheik CS, Dick GJ: **Evidence for hydrogen oxidation**  
878 **and metabolic plasticity in widespread deep-sea sulfur-oxidizing bacteria.** *Proc*  
879 *Natl Acad Sci U S A* 2013, **110**:330.
- 880 44. Olm MR, Brown CT, Brooks B, Banfield JF: **dRep: a tool for fast and accurate**  
881 **genomic comparisons that enables improved genome recovery from metagenomes**  
882 **through de-replication.** *ISME J* 2017, **11**:2864.
- 883 45. Glass JB, Ranjan P, Kretz CB, Nunn BL, Johnson AM, McManus J, Stewart FJ:  
884 **Adaptations of *Atribacteria* to life in methane hydrates: hot traits for cold life.**  
885 *bioRxiv* 2019:536078.
- 886 46. Tran PQ, McIntyre PB, Kraemer BM, Vadeboncoeur Y, Kimirei IA, Tamatamah R,  
887 McMahan KD, Anantharaman K: **Depth-discrete eco-genomics of Lake Tanganyika**

- 888 **reveals roles of diverse microbes, including candidate phyla, in tropical freshwater**  
889 **nutrient cycling.** *bioRxiv* 2019:834861.
- 890 47. Feng Q, Liang S, Jia H, Stadlmayr A, Tang L, Lan Z, Zhang D, Xia H, Xu X, Jie Z, et  
891 al: **Gut microbiome development along the colorectal adenoma–carcinoma**  
892 **sequence.** *Nat Commun* 2015, **6**:6528.
- 893 48. Diamond S, Andeer PF, Li Z, Crits-Christoph A, Burstein D, Anantharaman K, Lane  
894 KR, Thomas BC, Pan C, Northen TR, Banfield JF: **Mediterranean grassland soil C–**  
895 **N compound turnover is dependent on rainfall and depth, and is mediated by**  
896 **genomically divergent microorganisms.** *Nat Microbiol* 2019, **4**:1356-1367.
- 897 49. Stamps BW, Leddy MB, Plumlee MH, Hasan NA, Colwell RR, Spear JR:  
898 **Characterization of the Microbiome at the World’s Largest Potable Water Reuse**  
899 **Facility.** *Front Microbio* 2018, **9**.
- 900 50. Tu Q, He Z, Li Y, Chen Y, Deng Y, Lin L, Hemme CL, Yuan T, Van Nostrand JD, Wu  
901 L, et al: **Development of HuMiChip for Functional Profiling of Human**  
902 **Microbiomes.** *PLoS One* 2014, **9**:e90546.
- 903 51. Kolde R, Kolde MR: **Package ‘pheatmap’.** *R Package* 2015, **1**:790.
- 904 52. Hyatt D, Chen G-L, LoCascio PF, Land ML, Larimer FW, Hauser LJ: **Prodigal:**  
905 **prokaryotic gene recognition and translation initiation site identification.** *BMC*  
906 *Bioinformatics* 2010, **11**:119.
- 907 53. Muto A, Kotera M, Tokimatsu T, Nakagawa Z, Goto S, Kanehisa M: **Modular**  
908 **architecture of metabolic pathways revealed by conserved sequences of reactions.**  
909 *Journal of Chemical Information and Modeling* 2013, **53**:613-622.
- 910 54. Kuypers MMM, Marchant HK, Kartal B: **The microbial nitrogen-cycling network.**  
911 *Nat Rev Microbiol* 2018, **16**:263-276.
- 912 55. Hug LA, Co R: **It Takes a Village: Microbial Communities Thrive through**  
913 **Interactions and Metabolic Handoffs.** *mSystems* 2018, **3**:e00152-00117.
- 914 56. Graf DRH, Jones CM, Hallin S: **Intergenomic Comparisons Highlight Modularity**  
915 **of the Denitrification Pathway and Underpin the Importance of Community**  
916 **Structure for N<sub>2</sub>O Emissions.** *PLoS One* 2014, **9**:e114118.
- 917 57. Mukhopadhyay R, Rosen BP, Phung LT, Silver S: **Microbial arsenic: from geocycles**  
918 **to genes and enzymes.** *FEMS Microbiol Rev* 2002, **26**:311-325.
- 919 58. Zhou Z, Liu Y, Pan J, Cron BR, Toner BM, Anantharaman K, Breier JA, Dick GJ, Li  
920 M: **Gammaproteobacteria mediating utilization of methyl-, sulfur- and petroleum**  
921 **organic compounds in deep ocean hydrothermal plumes.** *ISME J* 2020.
- 922 59. Shih PM, Ward LM, Fischer WW: **Evolution of the 3-hydroxypropionate bicycle and**  
923 **recent transfer of anoxygenic photosynthesis into the Chloroflexi.** *Proc Natl Acad*  
924 *Sci U S A* 2017, **114**:10749-10754.
- 925 60. Berg IA, Kockelkorn D, Buckel W, Fuchs G: **A 3-hydroxypropionate/4-**  
926 **hydroxybutyrate autotrophic carbon dioxide assimilation pathway in Archaea.**  
927 *Science* 2007, **318**:1782-1786.
- 928 61. Pester M, Schleper C, Wagner M: **The *Thaumarchaeota*: an emerging view of their**  
929 **phylogeny and ecophysiology.** *Curr Opin Microbiol* 2011, **14**:300-306.
- 930 62. Kanehisa M, Sato Y, Morishima K: **BlastKOALA and GhostKOALA: KEGG tools**  
931 **for functional characterization of genome and metagenome sequences.** *J Mol Biol*

- 932 2016, **428**:726-731.
- 933 63. Moriya Y, Itoh M, Okuda S, Yoshizawa AC, Kanehisa M: **KAAS: an automatic**  
934 **genome annotation and pathway reconstruction server.** *Nucleic Acids Res* 2007,  
935 **35**:W182-W185.
- 936 64. Olson DL, Delen D: *Advanced data mining techniques.* Berlin, Heidelberg: Springer-  
937 Verlag Berlin Heidelberg 2008.
- 938 65. Glass JB, Ranjan P, Kretz CB, Nunn BL, Johnson AM, McManus J, Stewart FJ: **Adaptations of Atribacteria to life in methane hydrates: hot traits for cold life.**  
939 *bioRxiv* 2019, **1**:536078.
- 941 66. Anantharaman K, Breier JA, Dick GJ: **Metagenomic resolution of microbial**  
942 **functions in deep-sea hydrothermal plumes across the Eastern Lau Spreading**  
943 **Center.** *ISME J* 2015, **10**:225.
- 944 67. Anantharaman K, Duhaime MB, Breier JA, Wendt K, Toner BM, Dick GJ: **Sulfur**  
945 **Oxidation Genes in Diverse Deep-Sea Viruses.** *Science* 2014, **344**:757-760.
- 946 68. Zhou Z, Tran PQ, Kieft K, Anantharaman K: **Genome diversification in globally**  
947 **distributed novel marine Proteobacteria is linked to environmental adaptation.**  
948 *ISME J* 2020, **14**:2060-2077.
- 949 69. Baker BJ, Saw JH, Lind AE, Lazar CS, Hinrichs K-U, Teske AP, Ettema TJG: **Genomic**  
950 **inference of the metabolism of cosmopolitan subsurface Archaea, Hadesarchaea.**  
951 *Nat Microbiol* 2016, **1**:16002.
- 952 70. Madigan MT, John M. Martinko, Kelly S. Bender, Daniel H. Buckley, and David Allan  
953 Stahl: *Brock Biology of Microorganisms.* Fourteenth edition edn. Boston: Pearson;  
954 2015.
- 955 71. Turnbaugh PJ, Ley RE, Hamady M, Fraser-Liggett CM, Knight R, Gordon JI: **The**  
956 **Human Microbiome Project.** *Nature* 2007, **449**:804-810.
- 957  
958  
959  
960  
961  
962  
963  
964  
965  
966  
967  
968  
969  
970  
971  
972  
973  
974  
975

976  
977  
978  
979  
980  
981  
982  
983  
984  
985  
986  
987  
988  
989  
990  
991  
992  
993  
994  
995  
996  
997  
998  
999  
1000  
1001  
1002  
1003  
1004  
1005  
1006  
1007  
1008  
1009  
1010  
1011  
1012  
1013  
1014  
1015  
1016  
1017  
1018  
1019  
1020  
1021  
1022  
1023  
1024  
1025  
1026  
1027  
1028  
1029  
1030  
1031

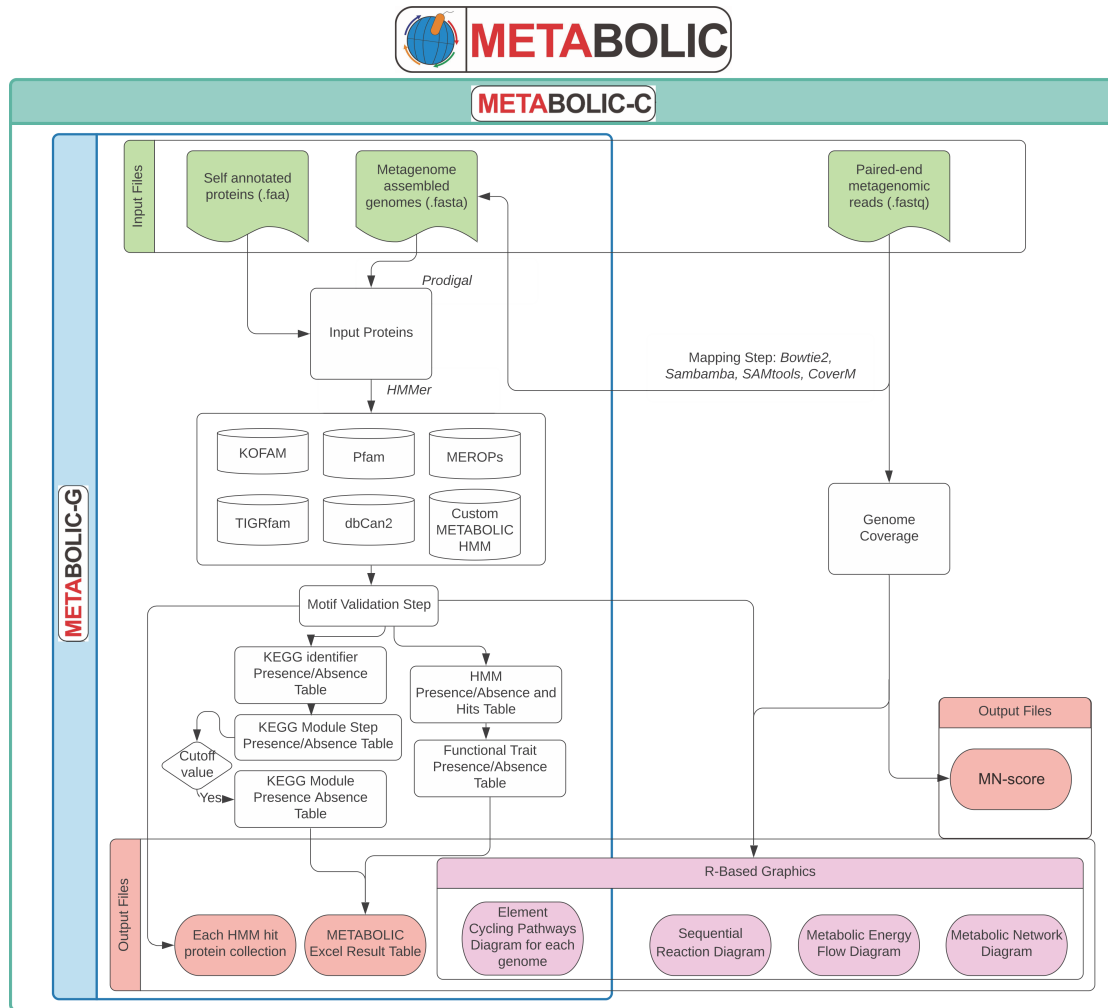

**Figure 1. An outline of the workflow of METABOLIC.** Detailed instructions are available at <https://github.com/AnantharamanLab/METABOLIC>. METABOLIC-G workflow was specifically shown in the blue square and METABOLIC-C workflow was shown in the green square.

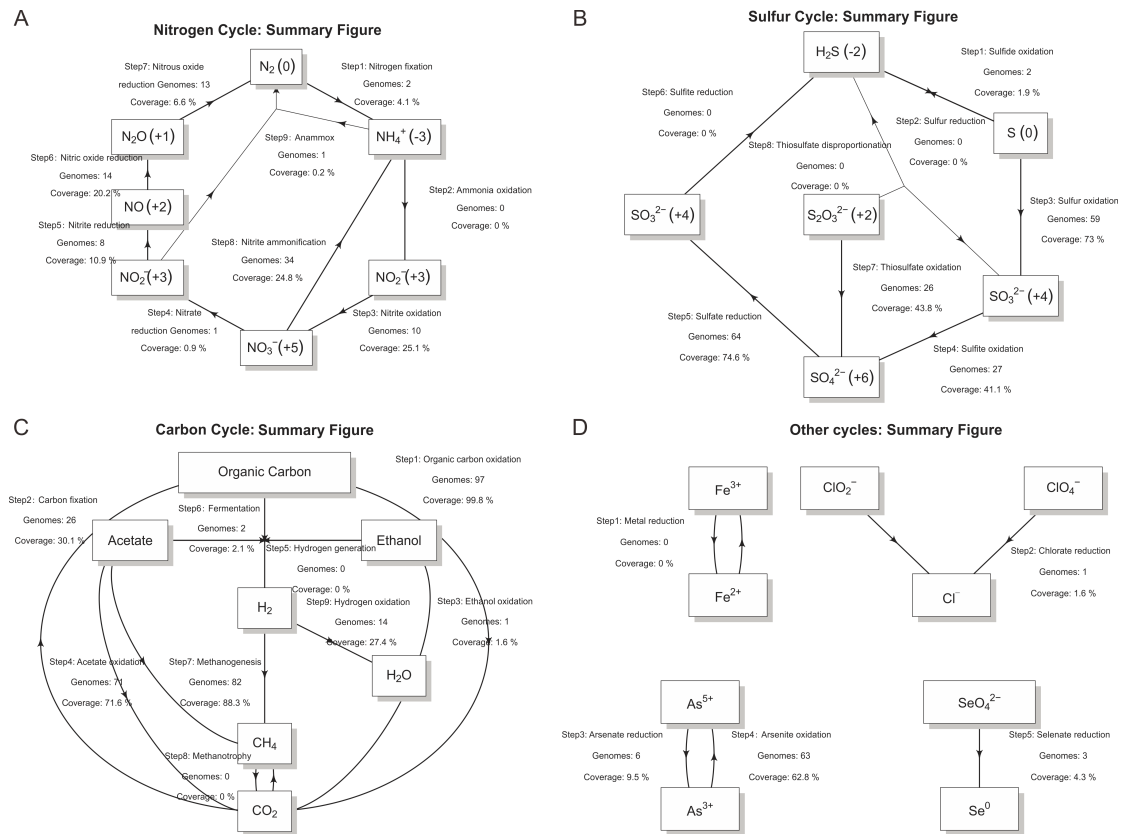

**Figure 2. Summary scheme of biogeochemical cycling processes at the community scale.** Each arrow represents a single transformation/step within a cycle. Labels above each arrow are (from top to bottom): step number and reaction, number of genomes that can conduct these reactions, metagenomic coverage of genomes (represented as a percentage within the community) that can conduct these reactions.

1090  
1091  
1092  
1093  
1094  
1095  
1096  
1097  
1098  
1099  
1100  
1101  
1102  
1103  
1104  
1105  
1106  
1107  
1108  
1109  
1110  
1111  
1112  
1113  
1114  
1115  
1116  
1117  
1118  
1119  
1120  
1121  
1122  
1123  
1124  
1125  
1126  
1127  
1128  
1129  
1130  
1131  
1132  
1133  
1134  
1135  
1136  
1137  
1138  
1139  
1140  
1141  
1142  
1143  
1144  
1145  
1146  
1147

**A Inorganics**

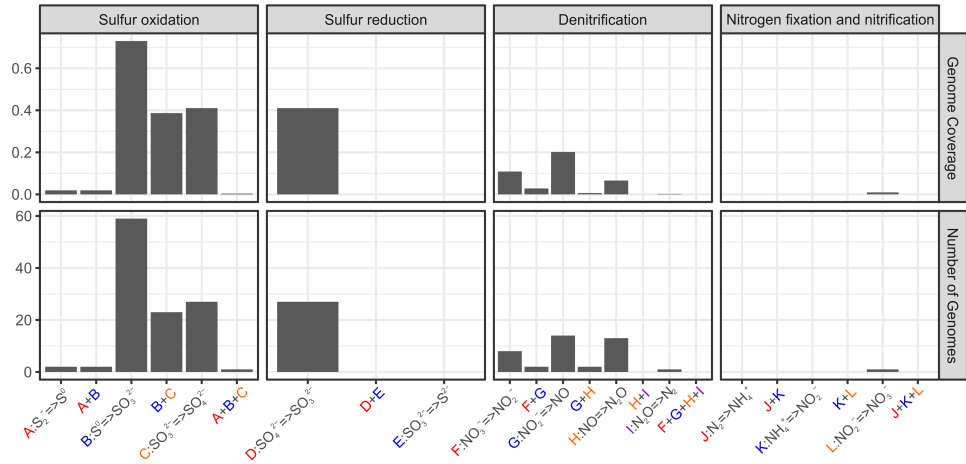

**B Organics**

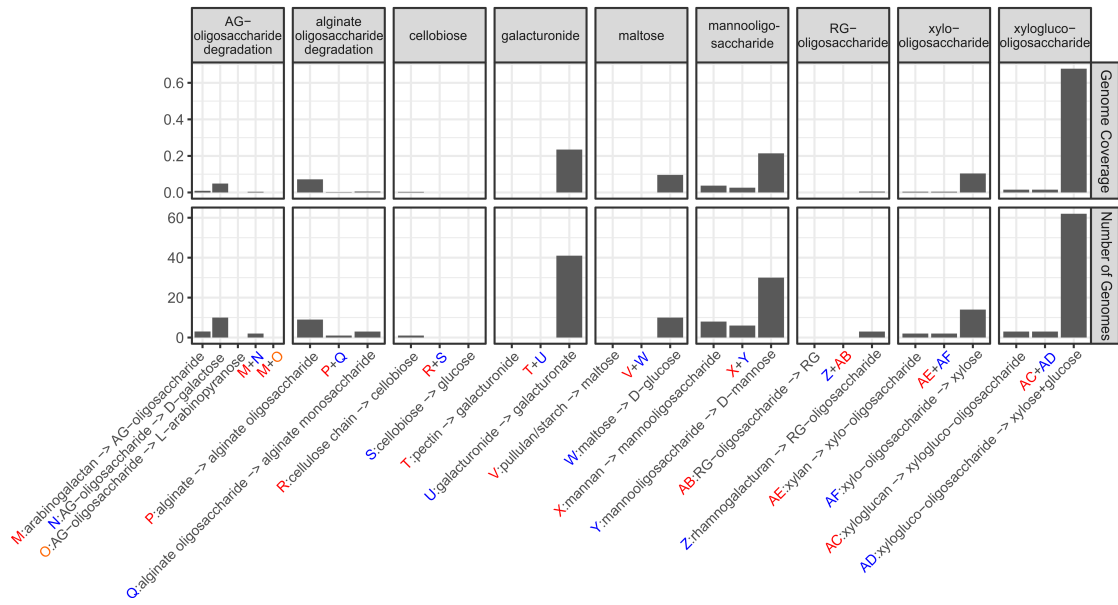

**Figure 3. Schematic figure of sequential metabolic transformations. (A)** the sequential transformation of inorganic compounds; **(B)** the sequential transformation of organic compounds. X-axes describe individual sequential transformations indicated by letters. The two panels describe the number of genomes and genome coverage (represented as a percentage within the community) of organisms that are involved in certain sequential metabolic transformations. The deep-sea hydrothermal vent dataset was used for these analyses.

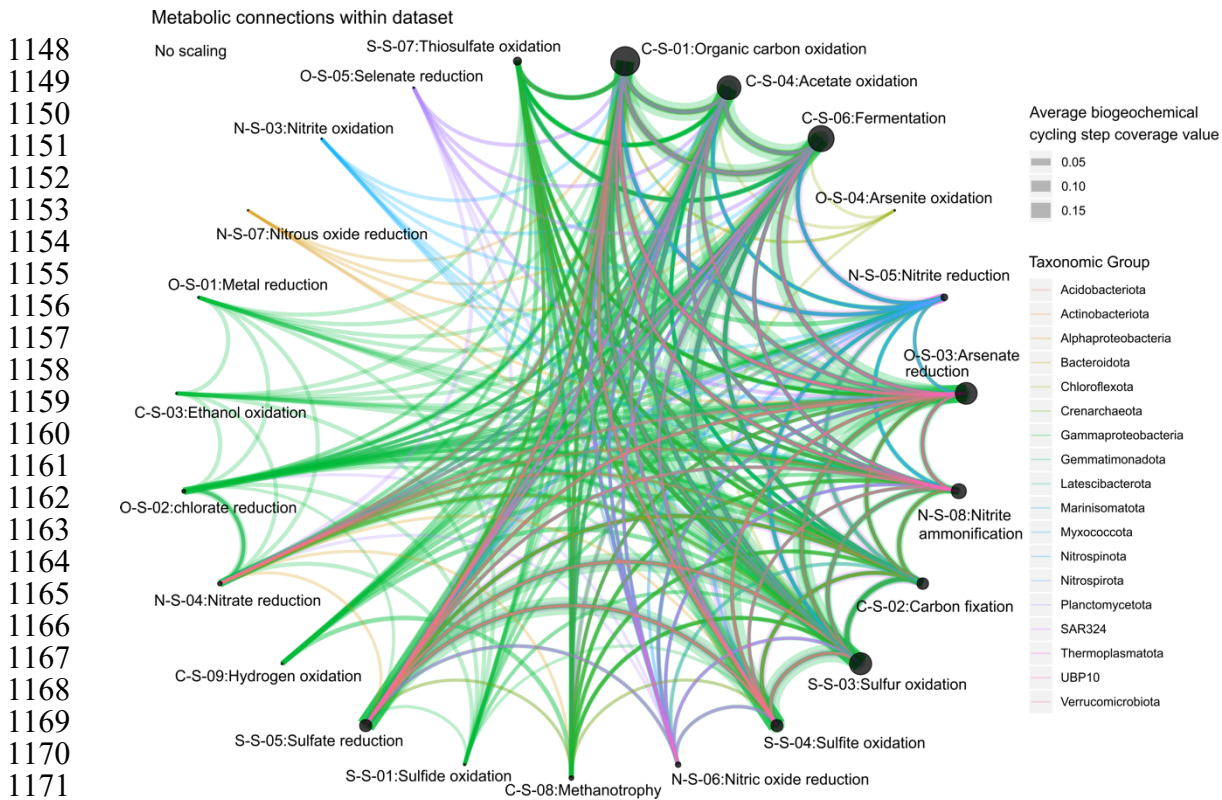

1173 **Figure 4. Metabolic network showing connections between different metabolisms in the**  
1174 **microbial community.** Nodes represent individual steps in biogeochemical cycles; edges  
1175 connecting two given nodes represent the metabolic connections between nodes, which is  
1176 enabled by organisms that can conduct both biogeochemical processes/steps. The thickness of  
1177 the edge was depicted according to the average of gene coverage values of the two connected  
1178 biogeochemical cycling steps – for example, thiosulfate oxidation and organic carbon  
1179 oxidation.. The color of the edges was assigned based on the taxonomy of the represented  
1180 genome. The deep-sea hydrothermal vent dataset was used for these analyses.

1181  
1182  
1183  
1184  
1185  
1186  
1187  
1188  
1189  
1190  
1191  
1192  
1193  
1194  
1195  
1196  
1197  
1198  
1199  
1200  
1201  
1202  
1203  
1204  
1205





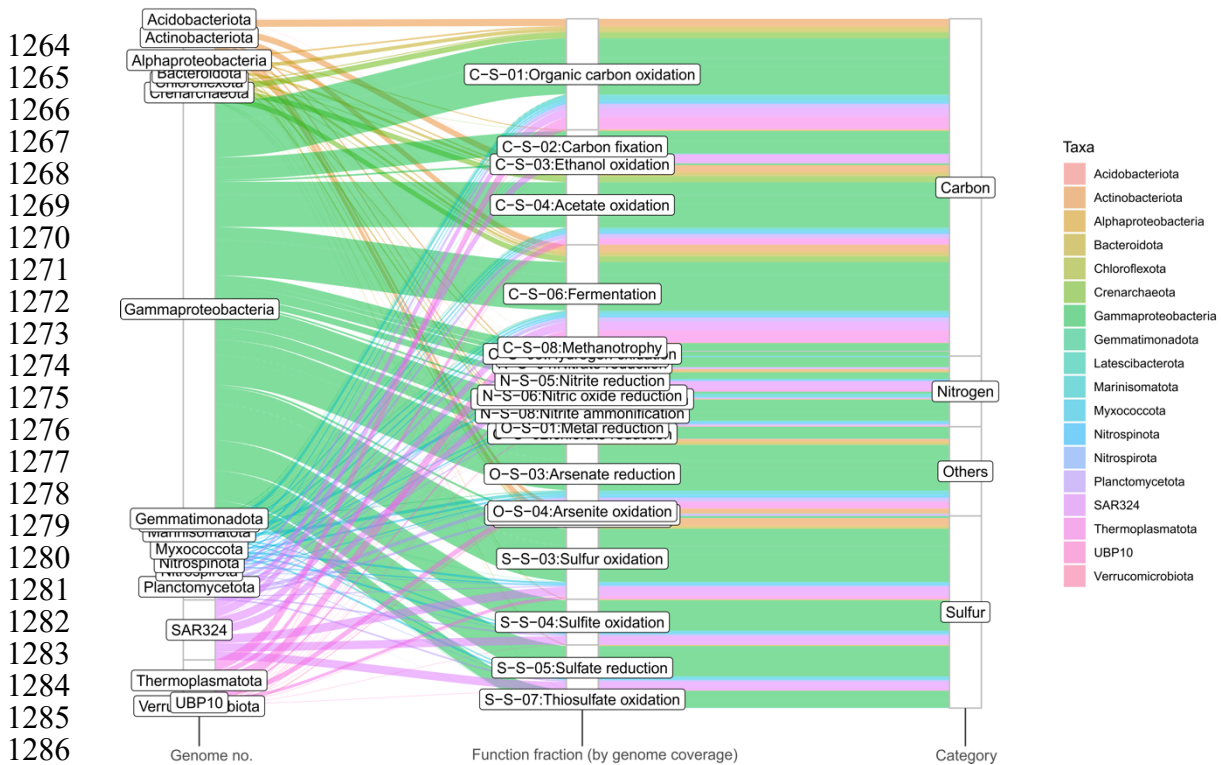

**Figure 6. Metabolic energy flow potential diagram representing the contributions of microbial genomes to individual metabolic and biogeochemical processes, and at the scale of entire elemental cycles.** Microbial genomes are represented at the phylum-level resolution. The three columns from left to right represent taxonomic groups scaled by the number of genomes, the contribution to each metabolic function by microbial groups calculated based on genome coverage, and the function category/biogeochemical cycle. The colors were assigned based on the taxonomy of the microbial groups. The deep-sea hydrothermal vent dataset was used for these analyses.

1322  
1323  
1324  
1325  
1326  
1327  
1328  
1329  
1330  
1331  
1332  
1333  
1334  
1335  
1336  
1337  
1338  
1339  
1340  
1341  
1342  
1343  
1344  
1345  
1346  
1347  
1348  
1349  
1350  
1351  
1352  
1353  
1354  
1355  
1356  
1357  
1358  
1359  
1360  
1361  
1362  
1363  
1364  
1365  
1366  
1367  
1368  
1369  
1370  
1371  
1372  
1373  
1374  
1375  
1376  
1377  
1378  
1379

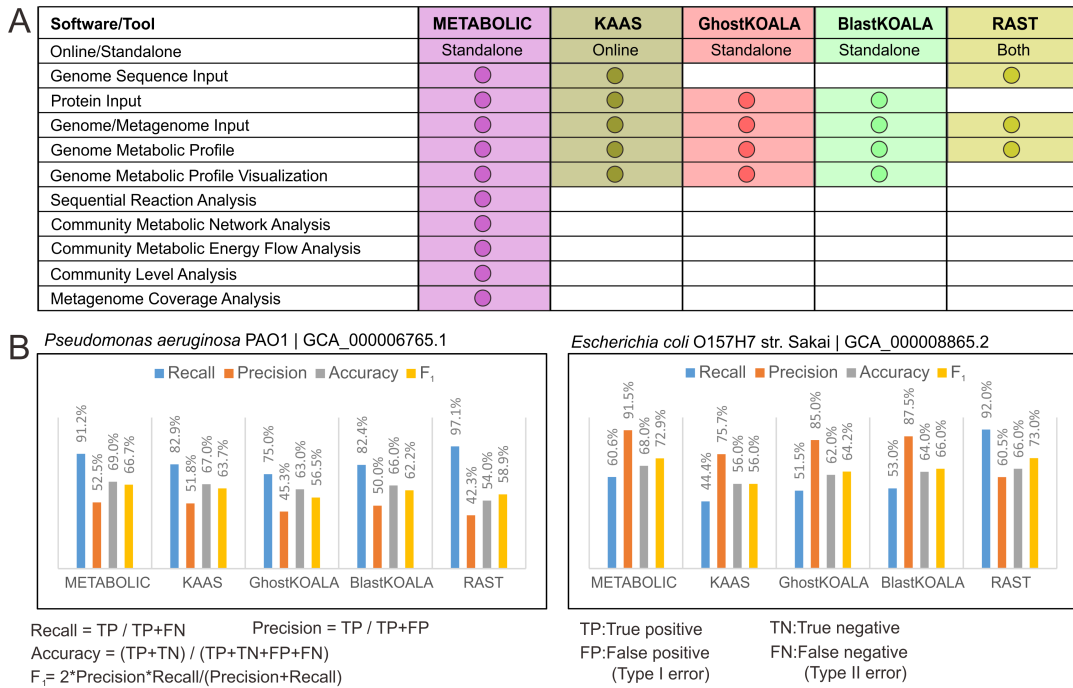

**Figure 7. Comparison of METABOLIC with other software packages and online servers.** (A) Comparison of the workflows and services, (B) Comparison of performance of protein prediction for two representative genomes, *Pseudomonas aeruginosa* PAO1, and *Escherichia coli* O157H7 str. sakai.

1380  
1381  
1382  
1383  
1384  
1385  
1386  
1387  
1388  
1389  
1390  
1391  
1392  
1393  
1394  
1395  
1396  
1397  
1398  
1399  
1400  
1401  
1402  
1403  
1404  
1405  
1406  
1407  
1408  
1409  
1410  
1411  
1412  
1413  
1414  
1415  
1416  
1417  
1418  
1419  
1420  
1421  
1422  
1423  
1424  
1425  
1426  
1427  
1428  
1429  
1430  
1431  
1432  
1433  
1434  
1435  
1436  
1437

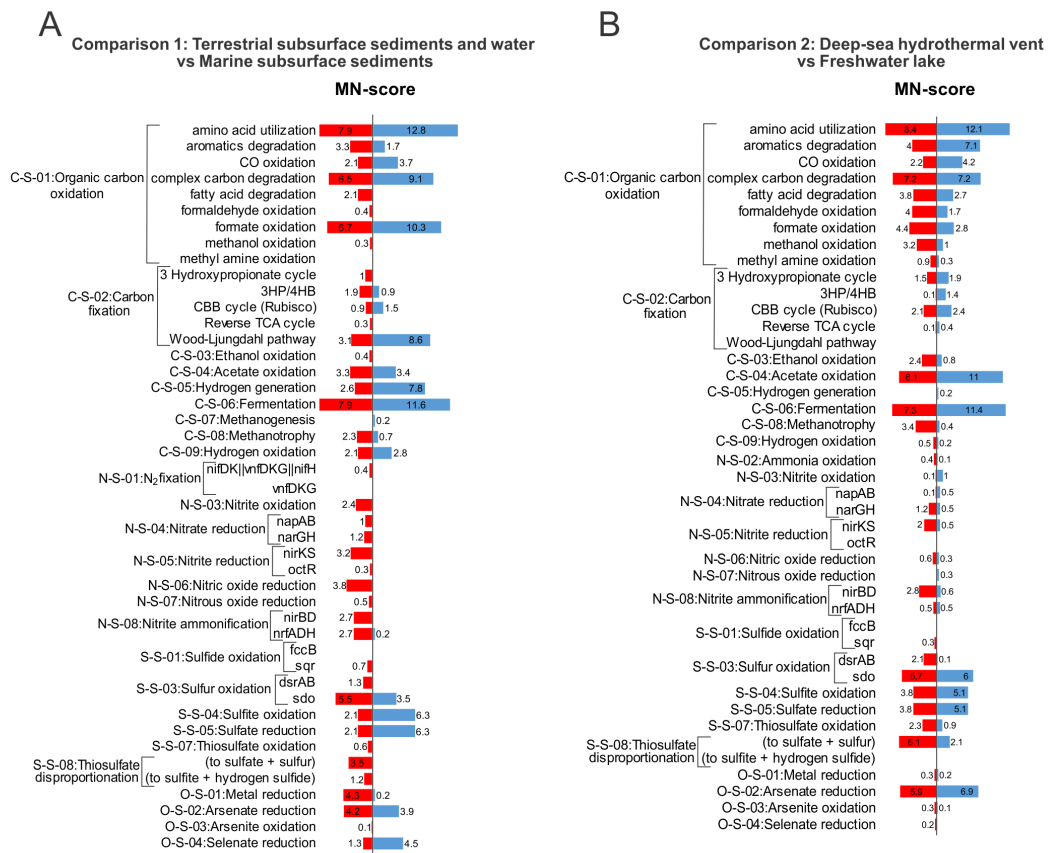

**Figure 8. Community metabolism comparison based on MN-scores. (A)** Comparison between marine subsurface and terrestrial subsurface. **(B)** Comparison between freshwater lake and deep-sea hydrothermal vent. MN-scores were calculated as gene coverage fractions for individual metabolic functions. Functions with MN-scores in both environments as zero were removed from each panel, e.g., N-S-02:Ammonia oxidation, N-S-09:Anammox, S-S-02:Sulfur reduction, and S-S-06:Sulfite reduction in Panel (A), and C-S-07:Methanogenesis, N-S-01:N<sub>2</sub> fixation, N-S-09:Anammox, S-S-02:Sulfur reduction, and S-S-06:Sulfite reduction in Panel (B). Details for MN-score and each microbial group contribution refer to [Supplementary Dataset S3](#).

1438  
1439  
1440  
1441  
1442  
1443  
1444  
1445  
1446  
1447  
1448  
1449  
1450  
1451  
1452  
1453  
1454  
1455  
1456  
1457  
1458  
1459  
1460  
1461  
1462  
1463  
1464  
1465  
1466  
1467  
1468  
1469  
1470  
1471  
1472  
1473  
1474  
1475  
1476  
1477  
1478  
1479  
1480  
1481  
1482  
1483  
1484  
1485  
1486  
1487  
1488  
1489  
1490  
1491  
1492  
1493  
1494  
1495

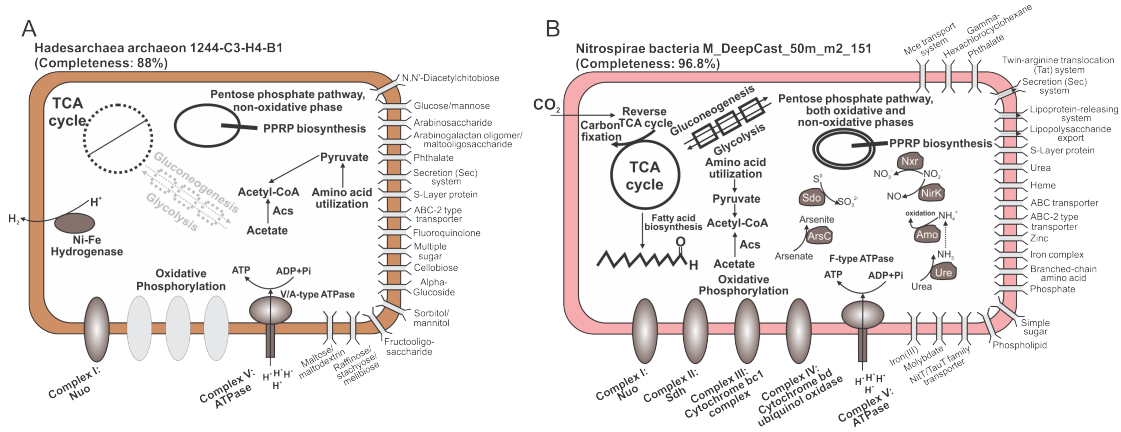

**Figure 9. Cell metabolism diagrams of two microbial genomes. (A) cell metabolism diagram of Hadesarchaea archaeon 1244-C3-H4-B1 (B) cell metabolism diagram of Nitrospirae bacteria M\_DeepCast\_50m\_m2\_151. The absent functional pathways/complexes were labeled with dash lines.**

1496  
1497  
1498  
1499  
1500  
1501  
1502  
1503  
1504  
1505  
1506  
1507  
1508  
1509  
1510  
1511  
1512  
1513  
1514  
1515  
1516  
1517  
1518  
1519  
1520  
1521  
1522  
1523  
1524  
1525  
1526  
1527  
1528  
1529  
1530  
1531  
1532  
1533  
1534  
1535  
1536  
1537  
1538  
1539  
1540  
1541  
1542  
1543  
1544  
1545  
1546  
1547  
1548  
1549  
1550  
1551  
1552

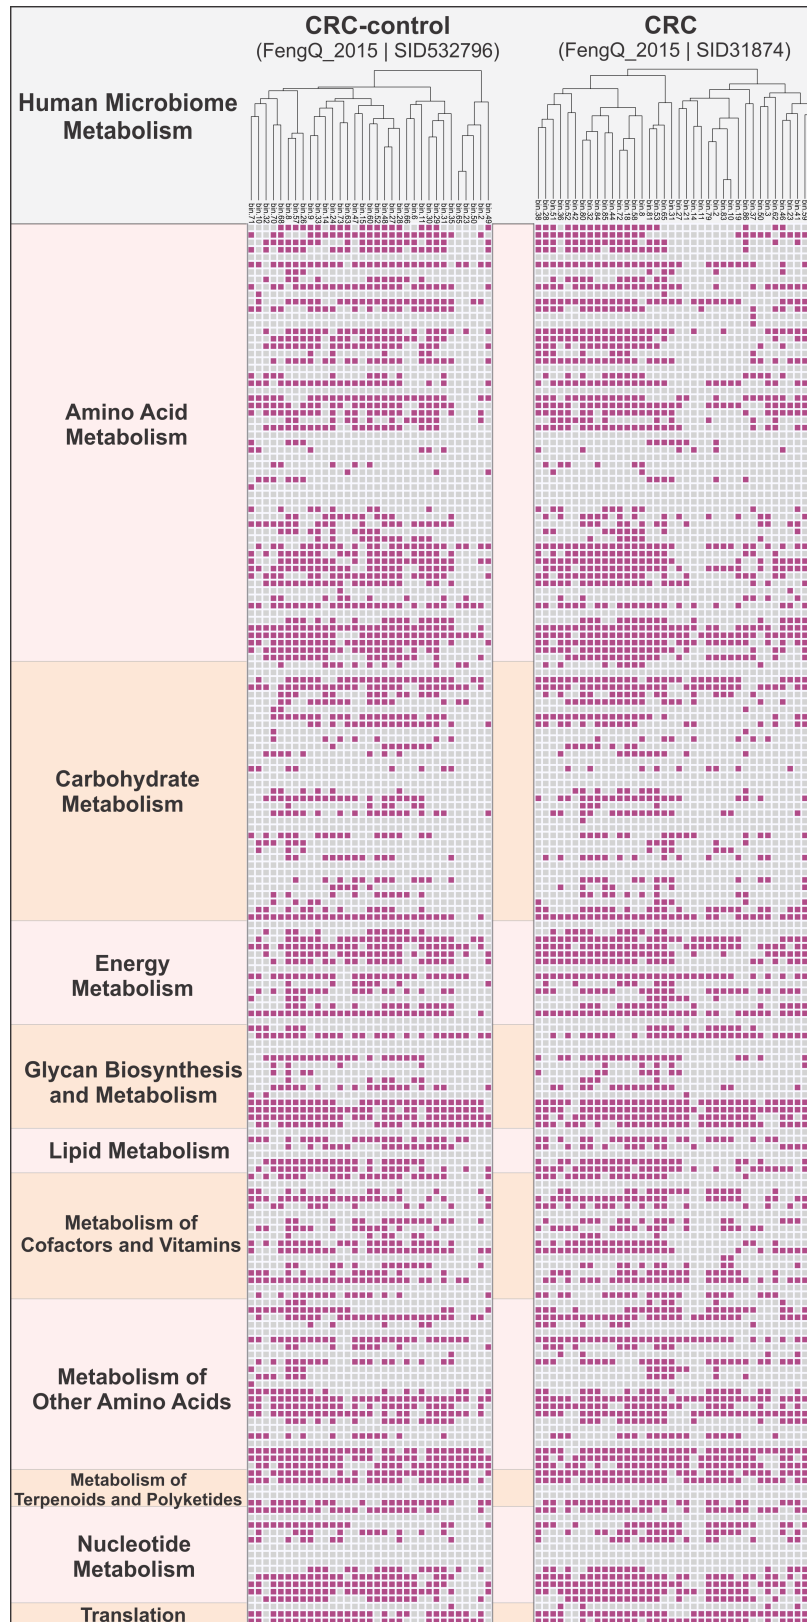

**Figure 10. Presence/Absence map of human microbiome metabolisms of a colorectal cancer patient (CRC) and a healthy control gut samples.** The heatmap has summarized 189 horizontal entries (189 lines) from 139 key functional gene families that covered 10 function categories. Detailed KEGG KO identifier IDs and protein information for each function category were described in [Supplementary Dataset S2](#).

**Table 1.** The carbon fixation metabolic traits of 15 tested bacterial and archaeal genomes predicted by both METABOLIC and KEGG genome database

|                 |                                           |                    |                | METABOLIC result |               | KEGG genome pathway |               |
|-----------------|-------------------------------------------|--------------------|----------------|------------------|---------------|---------------------|---------------|
|                 |                                           |                    |                | Carbon fixation  |               | Carbon fixation     |               |
| Accession ID    | Organism                                  | KEGG Organism Code | Group          | 3 HP cycle       | 3HP/4HB cycle | 3 HP cycle          | 3HP/4HB cycle |
| GCA_000011905.1 | <i>Dehalococcoides mccartyi</i> 195       | det                | Chloroflexi    | Absent           | Absent        | Absent              | Absent        |
| GCA_000017805.1 | <i>Roseiflexus castenholzii</i> DSM 13941 | rca                | Chloroflexi    | Present          | Absent        | Present             | Absent        |
| GCA_000018865.1 | <i>Chloroflexus aurantiacus</i> J-10-fl   | cau                | Chloroflexi    | Present          | Absent        | Present             | Absent        |
| GCA_000021685.1 | <i>Thermomicrobium roseum</i> DSM 5159    | tro                | Chloroflexi    | Absent           | Absent        | Absent              | Absent        |
| GCA_000021945.1 | <i>Chloroflexus aggregans</i> DSM 9485    | cag                | Chloroflexi    | Present          | Absent        | Present             | Absent        |
| GCA_000299395.1 | <i>Nitrosopumilus sediminis</i> AR2       | nir                | Thaumarchaeota | Absent           | Present       | Absent              | Present       |
| GCA_000698785.1 | <i>Nitrososphaera viennensis</i> EN76     | nvn                | Thaumarchaeota | Absent           | Present       | Absent              | Present       |
| GCA_000875775.1 | <i>Nitrosopumilus piranensis</i> D3C      | nid                | Thaumarchaeota | Absent           | Present       | Absent              | Present       |
| GCA_000812185.1 | <i>Nitrosopelagicus brevis</i> CN25       | nbv                | Thaumarchaeota | Absent           | Present       | Absent              | Present       |
| GCA_900696045.1 | <i>Nitrosocosmicus franklandus</i> NFRAN1 | nfn                | Thaumarchaeota | Absent           | Present       | Absent              | Present       |
| GCA_000015145.1 | <i>Hyperthermus butylicus</i> DSM 5456    | hbu                | Crenarchaeota  | Absent           | Absent        | Absent              | Absent        |
| GCA_000017945.1 | <i>Caldisphaera lagunensis</i> DSM 15908  | clg                | Crenarchaeota  | Absent           | Present       | Absent              | Present       |
| GCA_000148385.1 | <i>Vulcanisaeta distributa</i> DSM 14429  | vdi                | Crenarchaeota  | Absent           | Absent        | Absent              | Absent        |
| GCA_000193375.1 | <i>Thermoproteus uzoniensis</i> 768-20    | tuz                | Crenarchaeota  | Absent           | Present       | Absent              | Present       |
| GCA_003431325.1 | <i>Acidilobus</i> sp. 7A                  | acia               | Crenarchaeota  | Absent           | Absent        | Absent              | Absent        |
