# Supplementary material for: METABOLIC: High-throughput profiling of microbial genomes for functional traits, biogeochemistry, and community-scale metabolic networks
Source: bioRxiv or medRxiv preprint supplement (doi:10.1101/761643), 2020-11-09

# Nitrogen Cycle: Candidatus\_Marinimicrobia\_bacterium\_UWMA-0347

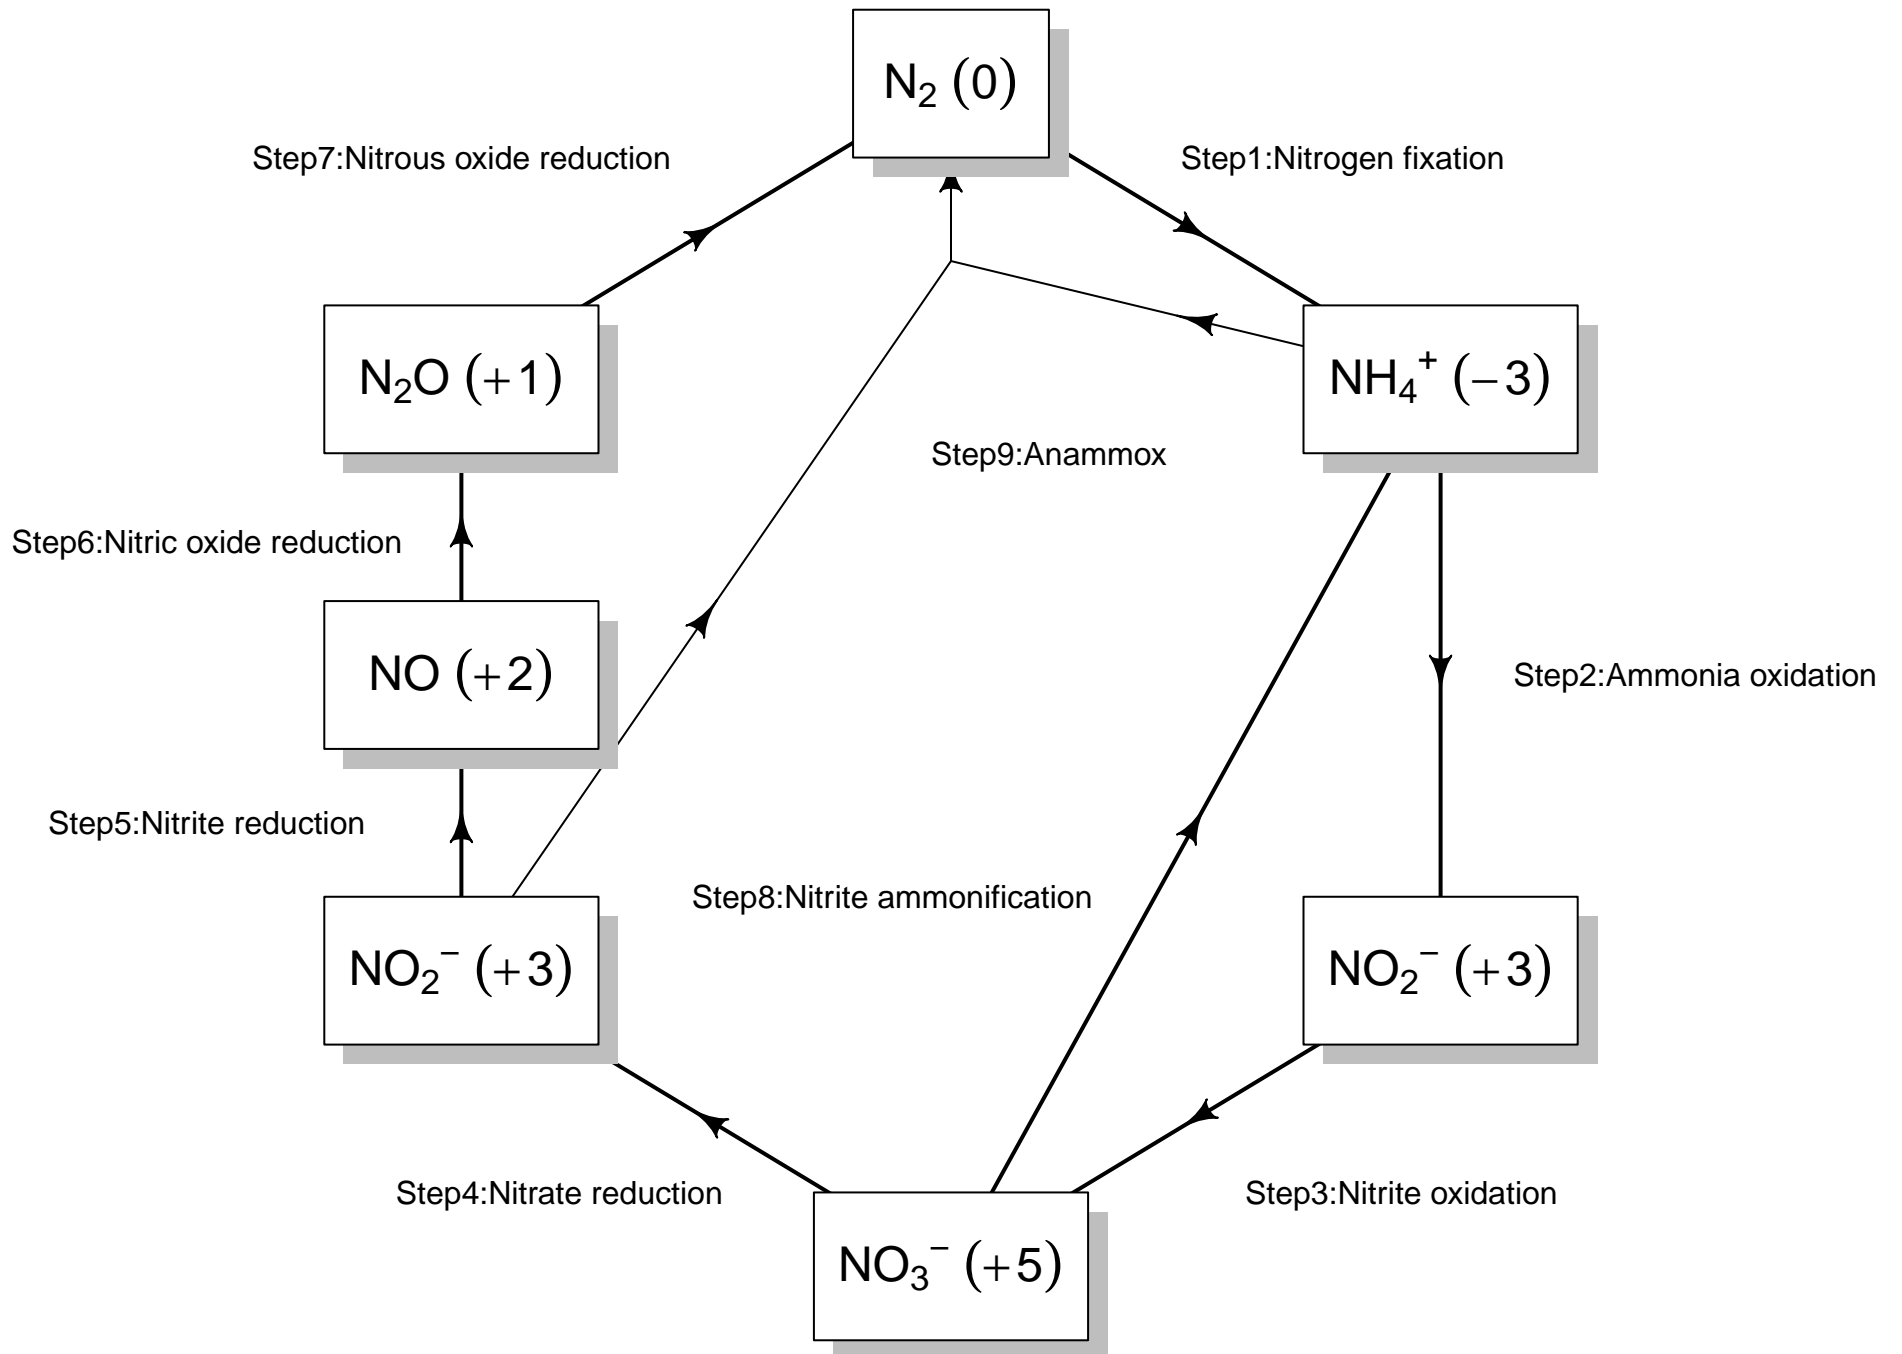

Supplement: Supplementary file [file media-1.zip]
